# Supplementary material for: Planar pentacoordinate carbon in [XC7H2]2+(X = Be and Mg) and its derivatives
Source: Royal Society of Chemistry journal article supplement (doi:10.1039/d2cp03299f), 2022-01-01
Supplement: d2cp03299f1.pdf [file d2cp03299f1.pdf]

**Supporting information for:**  
**Planar pentacoordinate carbon in  $[\text{XC}_7\text{H}_2]^{2+}$  (X  
= Be and Mg) and its derivatives**

Pratik Sarkar,<sup>†</sup> Krishnan Thirumoorthy,<sup>‡</sup> Anakuthil Anoop,<sup>\*,†</sup> and Venkatesan S.  
Thimmakonda<sup>\*,¶</sup>

<sup>†</sup>*Department of Chemistry, Department of Chemistry, Indian Institute of Technology  
Kharagpur, Kharagpur - 721 302, India*

<sup>‡</sup>*Department of Chemistry, School of Advanced Sciences, Vellore Institute of Technology,  
Vellore - 632 014, Tamil Nadu, India*

<sup>¶</sup>*Department of Chemistry and Biochemistry, San Diego State University, San Diego, CA  
92182-1030, USA*

E-mail: [anoop@chem.iitkgp.ac.in](mailto:anoop@chem.iitkgp.ac.in); [vthimmakondusamy@sdsu.edu](mailto:vthimmakondusamy@sdsu.edu)

# Contents

|                 |    |
|-----------------|----|
| List of Figures | S2 |
|-----------------|----|

|                |    |
|----------------|----|
| List of Tables | S3 |
|----------------|----|

## List of Figures

|    |                                                                                                                                                                                                                                                |     |
|----|------------------------------------------------------------------------------------------------------------------------------------------------------------------------------------------------------------------------------------------------|-----|
| S1 | Isomers <b>1a</b> to <b>24a</b> of $[\text{BeC}_7\text{H}_2]^{2+}$ . ZPVE-corrected relative energies (in kcal mol <sup>-1</sup> ) are calculated at the CBS-QB3 level of theory. . . . .                                                      | S6  |
| S2 | Isomers <b>25a</b> to <b>48a</b> of $[\text{BeC}_7\text{H}_2]^{2+}$ . ZPVE-corrected relative energies (in kcal mol <sup>-1</sup> ) are calculated at the CBS-QB3 level of theory. . . . .                                                     | S7  |
| S3 | Isomers <b>1b</b> to <b>24b</b> of $[\text{MgC}_7\text{H}_2]^{2+}$ . ZPVE-corrected relative energies (in kcal mol <sup>-1</sup> ) are calculated at the CBS-QB3 level of theory. . . . .                                                      | S8  |
| S4 | Isomers <b>25b</b> to <b>43b</b> of $[\text{MgC}_7\text{H}_2]^{2+}$ . ZPVE-corrected relative energies (in kcal mol <sup>-1</sup> ) are calculated at the CBS-QB3 level of theory. . . . .                                                     | S9  |
| S5 | Isomers <b>1c</b> to <b>24c</b> of $[\text{BeSi}_2\text{C}_5\text{H}_2]^{2+}$ . ZPVE-corrected relative energies (in kcal mol <sup>-1</sup> ) are calculated at the CBS-QB3 level of theory. . . . .                                           | S10 |
| S6 | Isomers <b>25c</b> to <b>48c</b> of $[\text{BeSi}_2\text{C}_5\text{H}_2]^{2+}$ . ZPVE-corrected relative energies (in kcal mol <sup>-1</sup> ) are calculated at the CBS-QB3 level of theory. . . . .                                          | S11 |
| S7 | Isomers <b>1d</b> to <b>24d</b> of $[\text{MgSi}_2\text{C}_5\text{H}_2]^{2+}$ . ZPVE-corrected relative energies (in kcal mol <sup>-1</sup> ) are calculated at the CBS-QB3 level of theory. . . . .                                           | S12 |
| S8 | Isomers <b>25d</b> to <b>48d</b> of $[\text{MgSi}_2\text{C}_5\text{H}_2]^{2+}$ . ZPVE-corrected relative energies (in kcal mol <sup>-1</sup> ) are calculated at the CBS-QB3 level of theory. . . . .                                          | S13 |
| S9 | Optimized geometries of neutral $\text{XCl}_2\text{C}_7\text{H}_2$ and $\text{XSi}_2\text{C}_5\text{H}_2$ (X = Be and Mg) in their ground electronic states obtained at the PBE0-D3/def2-TZVP level of theory. All isomers are minima. . . . . | S14 |

|     |                                                                                                                                                                                                                                             |     |
|-----|---------------------------------------------------------------------------------------------------------------------------------------------------------------------------------------------------------------------------------------------|-----|
| S10 | Optimized geometries of neutral $XCl_2C_7H_2$ and $XSi_2C_5H_2$ ( $X = Be$ and $Mg$ ) in their ground electronic states obtained at the PBE0-D3/def2-TZVP level of theory. All isomers are minima. . . . .                                  | S15 |
| S11 | Mayer bonding analysis of $[BeC_7H_2]^{2+}$ ( <b>ppC-1</b> ), $[MgC_7H_2]^{2+}$ ( <b>ppC-2</b> ), $[BeSi_2C_5H_2]^{2+}$ ( <b>ppC-3</b> ), and $[MgSi_2C_5H_2]^{2+}$ ( <b>ppC-4</b> ) obtained at PBE0-D3/def2-TZVP level of theory. . . . . | S53 |

## List of Tables

|     |                                                                                                                                                                                                                       |     |
|-----|-----------------------------------------------------------------------------------------------------------------------------------------------------------------------------------------------------------------------|-----|
| S1  | Electron density descriptors (in a.u.) at the Bond Critical Point (BCP) and Ring Critical Point (RCP) obtained at the B3LYP-D3BJ/6-311++G(2d,2p) level of theory for $[BeC_7H_2]^{2+}$ ( <b>ppC-1</b> ) . . . . .     | S16 |
| S2  | Electron density descriptors (in a.u.) at the Bond Critical Point (BCP) and Ring Critical Point (RCP) obtained at the B3LYP-D3BJ/6-311++G(2d,2p) level of theory for $[MgC_7H_2]^{2+}$ ( <b>ppC-2</b> ) . . . . .     | S17 |
| S3  | Electron density descriptors (in a.u.) at the Bond Critical Point (BCP) and Ring Critical Point (RCP) obtained at the B3LYP-D3BJ/6-311++G(2d,2p) level of theory for $[BeSi_2C_5H_2]^{2+}$ ( <b>ppC-3</b> ) . . . . . | S18 |
| S4  | Electron density descriptors (in a.u.) at the Bond Critical Point (BCP) and Ring Critical Point (RCP) obtained at the B3LYP-D3BJ/6-311++G(2d,2p) level of theory for $MgSi_2C_5H_2^{2+}$ ( <b>ppC-4</b> ) . . . . .   | S19 |
| S5  | Computed energies of alkali and alkaline-earth metal ions at different levels.                                                                                                                                        | S23 |
| S6  | Computed energies of $C_7H_2$ and $Si_2C_5H_2$ at different levels. . . . .                                                                                                                                           | S24 |
| S7  | Computed energies of $M^+-C_7H_2$ at different levels. . . . .                                                                                                                                                        | S25 |
| S8  | Computed energies of $M^{2+}-C_7H_2$ at different levels. . . . .                                                                                                                                                     | S26 |
| S9  | Computed energies of $M^+-Si_2C_5H_2$ at different levels. . . . .                                                                                                                                                    | S27 |
| S10 | Computed energies of $M^{2+}-Si_2C_5H_2$ at different levels. . . . .                                                                                                                                                 | S28 |

|     |                                                                                                                                                                       |     |
|-----|-----------------------------------------------------------------------------------------------------------------------------------------------------------------------|-----|
| S11 | Computed energies of $[\text{XC}_7\text{H}_2]^{-/2-}$ or $[\text{XSi}_2\text{C}_5\text{H}_2]^{-/2-}$ at different levels. . . .                                       | S29 |
| S12 | Natural charges (q,  e ) on ppC atoms and Wiberg bond indices (WBI) calculated at the PBE0-D3/def2-TZVP level. . . . .                                                | S30 |
| S13 | Optimized geometries of $\text{C}_7\text{H}_2$ in Cartesian coordinates (in Å) and their total energies (in a.u) obtained at different levels. . . . .                | S31 |
| S14 | Optimized geometries of $\text{Si}_2\text{C}_5\text{H}_2$ in Cartesian coordinates (in Å) and their total energies (in a.u) obtained at different levels. . . . .     | S32 |
| S15 | Optimized geometries of $\text{Li}^+-\text{C}_7\text{H}_2$ in Cartesian coordinates (in Å) and their total energies (in a.u) obtained at different levels. . . . .    | S33 |
| S16 | Optimized geometries of $\text{Na}^+-\text{C}_7\text{H}_2$ in Cartesian coordinates (in Å) and their total energies (in a.u) obtained at different levels. . . . .    | S34 |
| S17 | Optimized geometries of $\text{K}^+-\text{C}_7\text{H}_2$ in Cartesian coordinates (in Å) and their total energies (in a.u) obtained at different levels. . . . .     | S35 |
| S18 | Optimized geometries of $\text{Rb}^+-\text{C}_7\text{H}_2$ in Cartesian coordinates (in Å) and their total energies (in a.u) obtained at different levels. . . . .    | S36 |
| S19 | Optimized geometries of $\text{Cs}^+-\text{C}_7\text{H}_2$ in Cartesian coordinates (in Å) and their total energies (in a.u) obtained at different levels. . . . .    | S37 |
| S20 | Optimized geometries of $\text{Be}^{2+}-\text{C}_7\text{H}_2$ in Cartesian coordinates (in Å) and their total energies (in a.u) obtained at different levels. . . . . | S38 |
| S21 | Optimized geometries of $\text{Mg}^{2+}-\text{C}_7\text{H}_2$ in Cartesian coordinates (in Å) and their total energies (in a.u) obtained at different levels. . . . . | S39 |
| S22 | Optimized geometries of $\text{Ca}^{2+}-\text{C}_7\text{H}_2$ in Cartesian coordinates (in Å) and their total energies (in a.u) obtained at different levels. . . . . | S40 |
| S23 | Optimized geometries of $\text{Sr}^{2+}-\text{C}_7\text{H}_2$ in Cartesian coordinates (in Å) and their total energies (in a.u) obtained at different levels. . . . . | S41 |
| S24 | Optimized geometries of $\text{Ba}^{2+}-\text{C}_7\text{H}_2$ in Cartesian coordinates (in Å) and their total energies (in a.u) obtained at different levels. . . . . | S42 |

|     |                                                                                                                                                                                              |     |
|-----|----------------------------------------------------------------------------------------------------------------------------------------------------------------------------------------------|-----|
| S25 | Optimized geometries of $\text{Li}^+\text{-Si}_2\text{C}_5\text{H}_2$ in Cartesian coordinates (in $\text{\AA}$ ) and their total energies (in a.u) obtained at different levels. . . . .    | S43 |
| S26 | Optimized geometries of $\text{Na}^+\text{-Si}_2\text{C}_5\text{H}_2$ in Cartesian coordinates (in $\text{\AA}$ ) and their total energies (in a.u) obtained at different levels. . . . .    | S44 |
| S27 | Optimized geometries of $\text{K}^+\text{-Si}_2\text{C}_5\text{H}_2$ in Cartesian coordinates (in $\text{\AA}$ ) and their total energies (in a.u) obtained at different levels. . . . .     | S45 |
| S28 | Optimized geometries of $\text{Rb}^+\text{-Si}_2\text{C}_5\text{H}_2$ in Cartesian coordinates (in $\text{\AA}$ ) and their total energies (in a.u) obtained at different levels. . . . .    | S46 |
| S29 | Optimized geometries of $\text{Cs}^+\text{-Si}_2\text{C}_5\text{H}_2$ in Cartesian coordinates (in $\text{\AA}$ ) and their total energies (in a.u) obtained at different levels. . . . .    | S47 |
| S30 | Optimized geometries of $\text{Be}^{2+}\text{-Si}_2\text{C}_5\text{H}_2$ in Cartesian coordinates (in $\text{\AA}$ ) and their total energies (in a.u) obtained at different levels. . . . . | S48 |
| S31 | Optimized geometries of $\text{Mg}^{2+}\text{-Si}_2\text{C}_5\text{H}_2$ in Cartesian coordinates (in $\text{\AA}$ ) and their total energies (in a.u) obtained at different levels. . . . . | S49 |
| S32 | Optimized geometries of $\text{Ca}^{2+}\text{-Si}_2\text{C}_5\text{H}_2$ in Cartesian coordinates (in $\text{\AA}$ ) and their total energies (in a.u) obtained at different levels. . . . . | S50 |
| S33 | Optimized geometries of $\text{Sr}^{2+}\text{-Si}_2\text{C}_5\text{H}_2$ in Cartesian coordinates (in $\text{\AA}$ ) and their total energies (in a.u) obtained at different levels. . . . . | S51 |
| S34 | Optimized geometries of $\text{Ba}^{2+}\text{-Si}_2\text{C}_5\text{H}_2$ in Cartesian coordinates (in $\text{\AA}$ ) and their total energies (in a.u) obtained at different levels. . . . . | S52 |

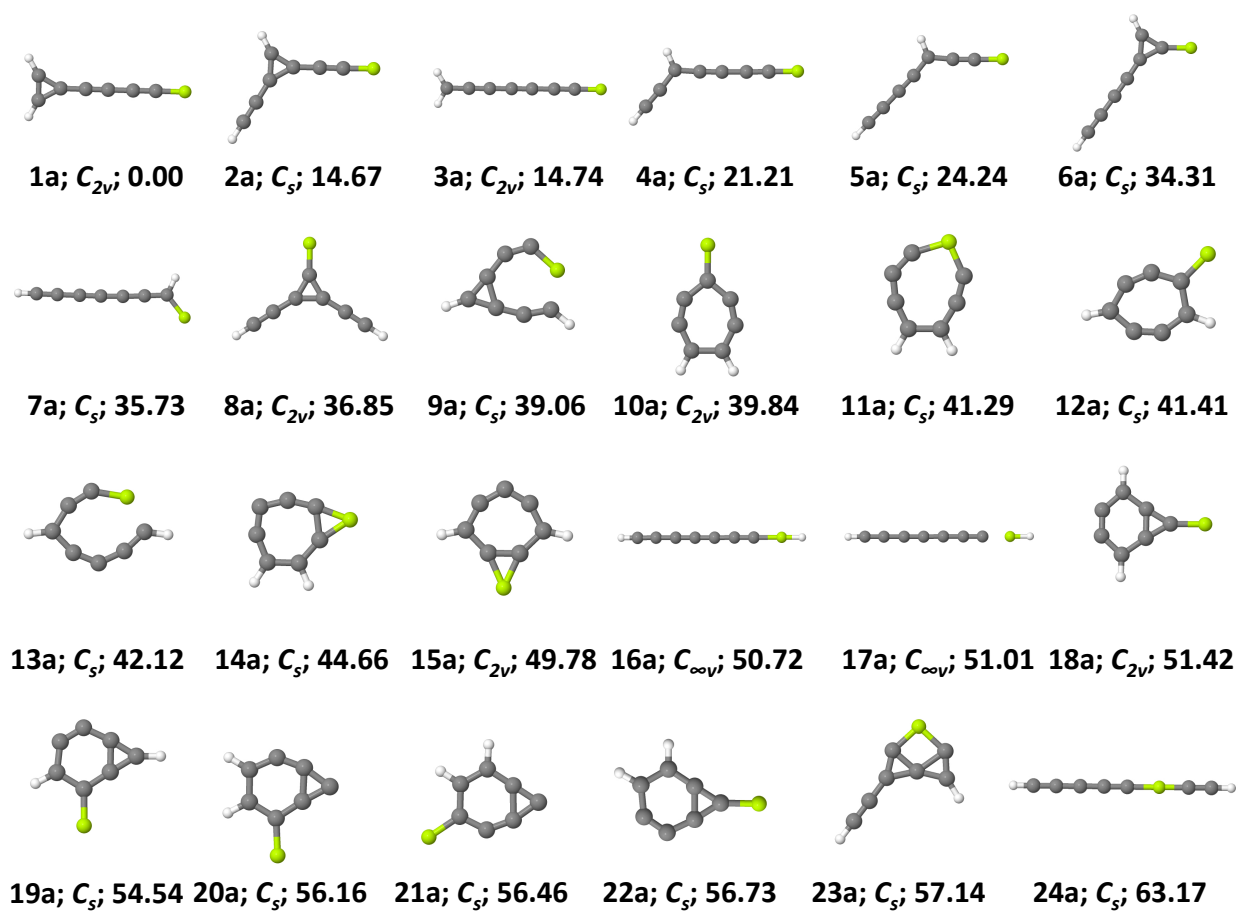

Figure S1: Isomers **1a** to **24a** of  $[\text{BeC}_7\text{H}_2]^{2+}$ . ZPVE-corrected relative energies (in  $\text{kcal mol}^{-1}$ ) are calculated at the CBS-QB3 level of theory.

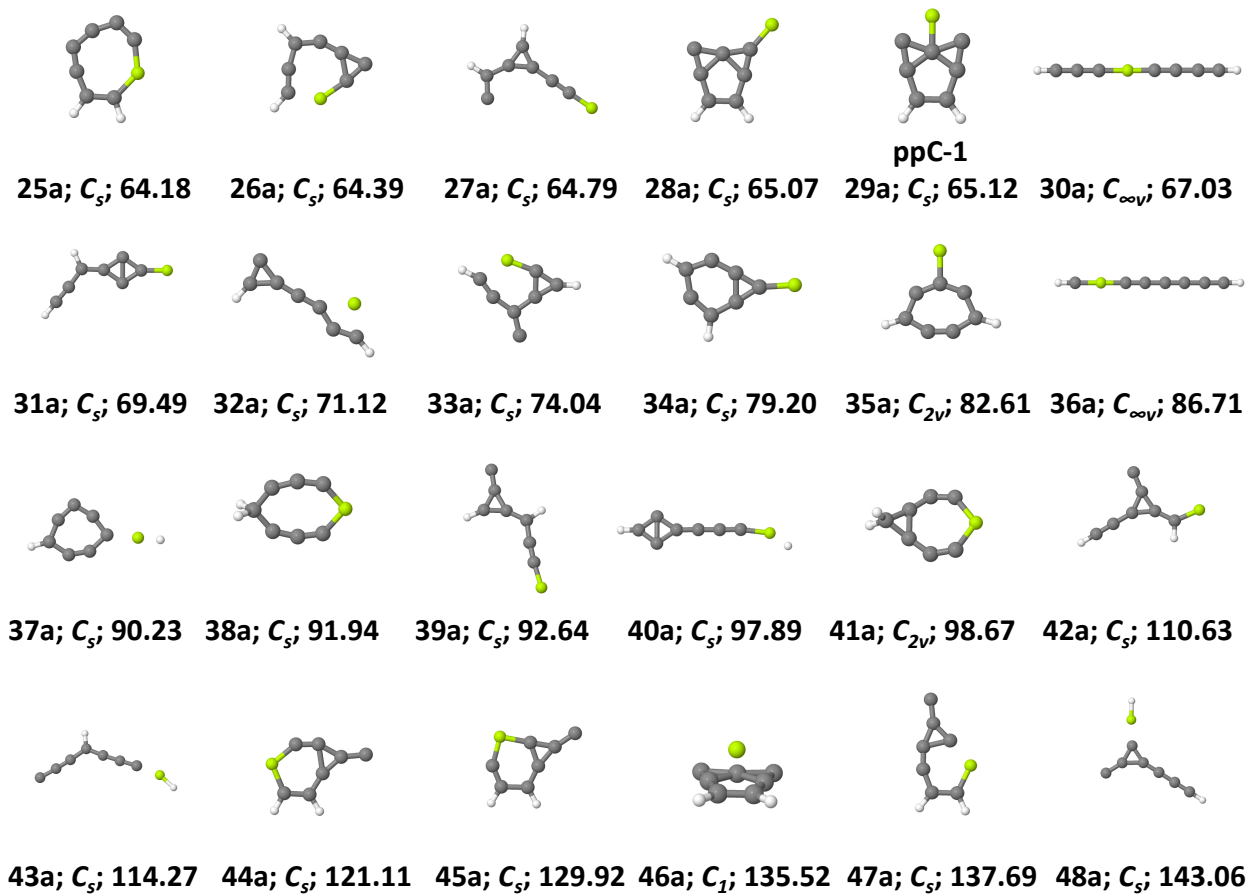

Figure S2: Isomers **25a** to **48a** of  $[\text{BeC}_7\text{H}_2]^{2+}$ . ZPVE-corrected relative energies (in kcal mol<sup>-1</sup>) are calculated at the CBS-QB3 level of theory.

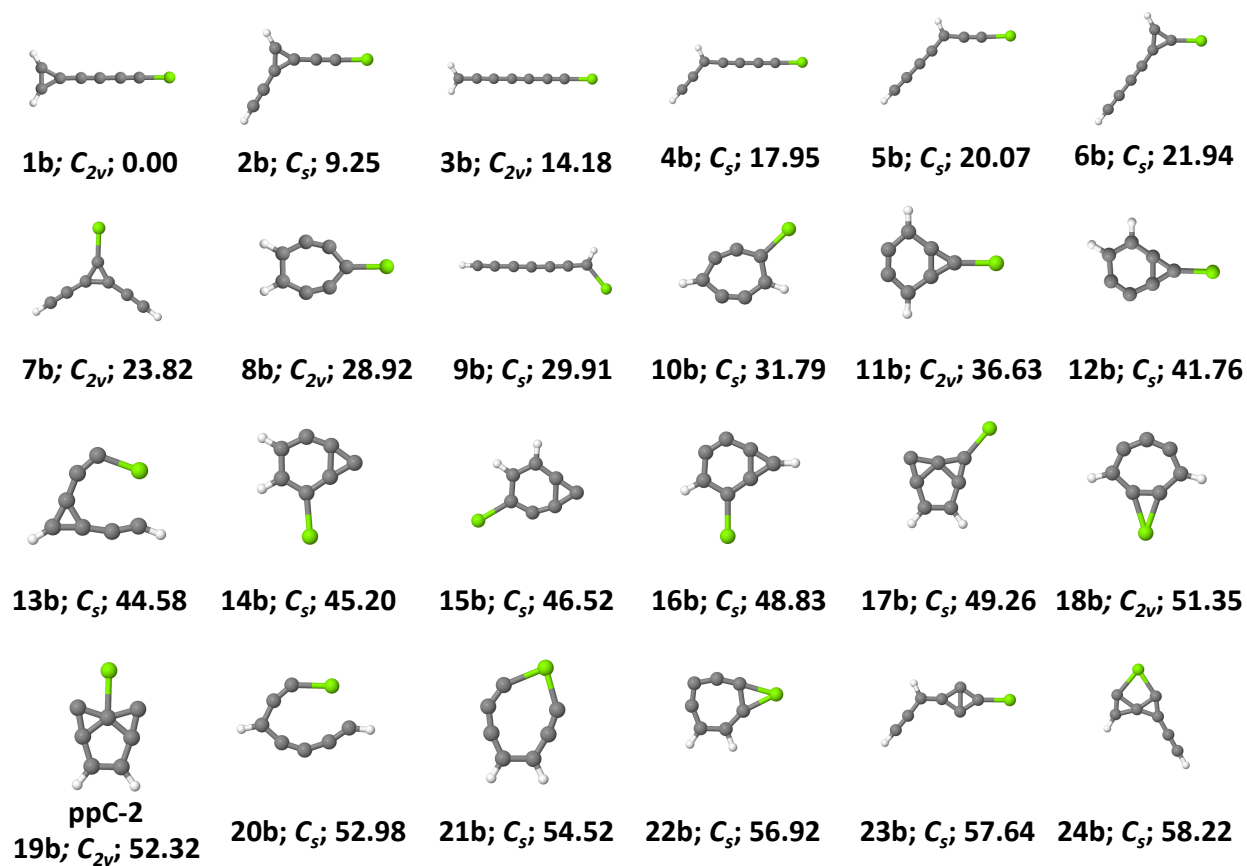

Figure S3: Isomers **1b** to **24b** of  $[\text{MgC}_7\text{H}_2]^{2+}$ . ZPVE-corrected relative energies (in  $\text{kcal mol}^{-1}$ ) are calculated at the CBS-QB3 level of theory.



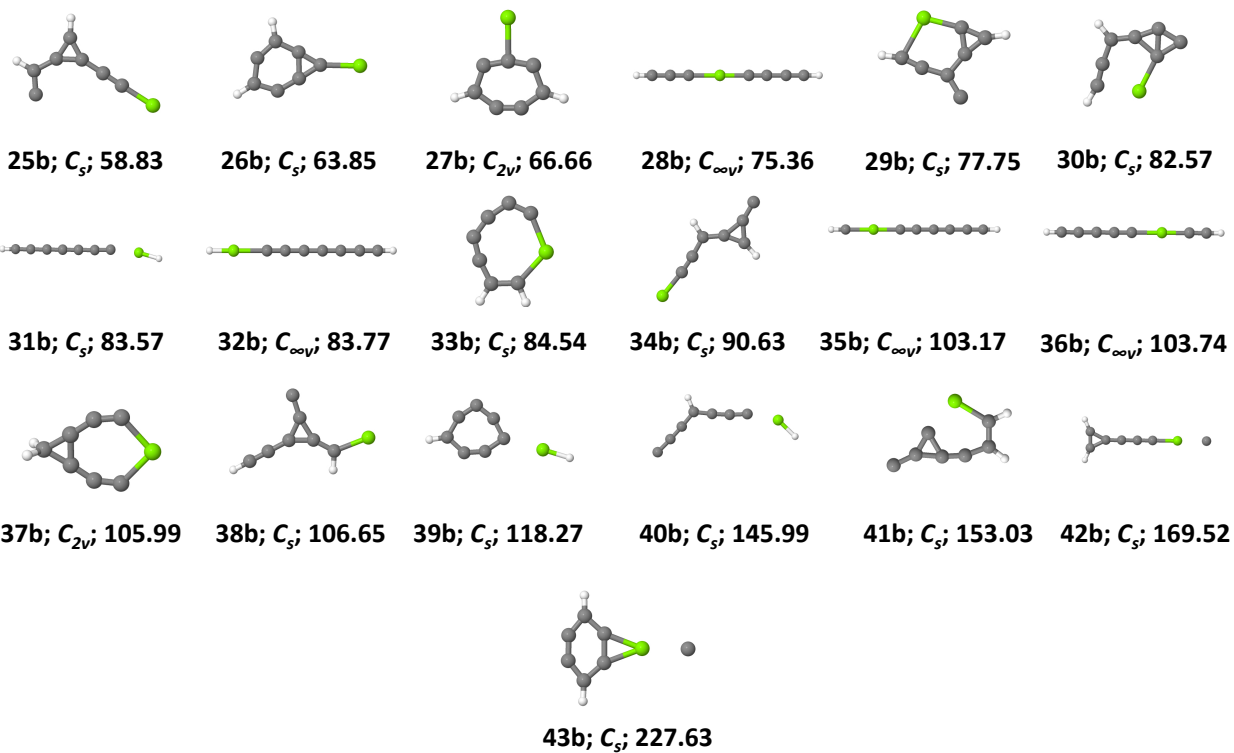

Figure S4: Isomers **25b** to **43b** of  $[\text{MgC}_7\text{H}_2]^{2+}$ . ZPVE-corrected relative energies (in kcal mol<sup>-1</sup>) are calculated at the CBS-QB3 level of theory.

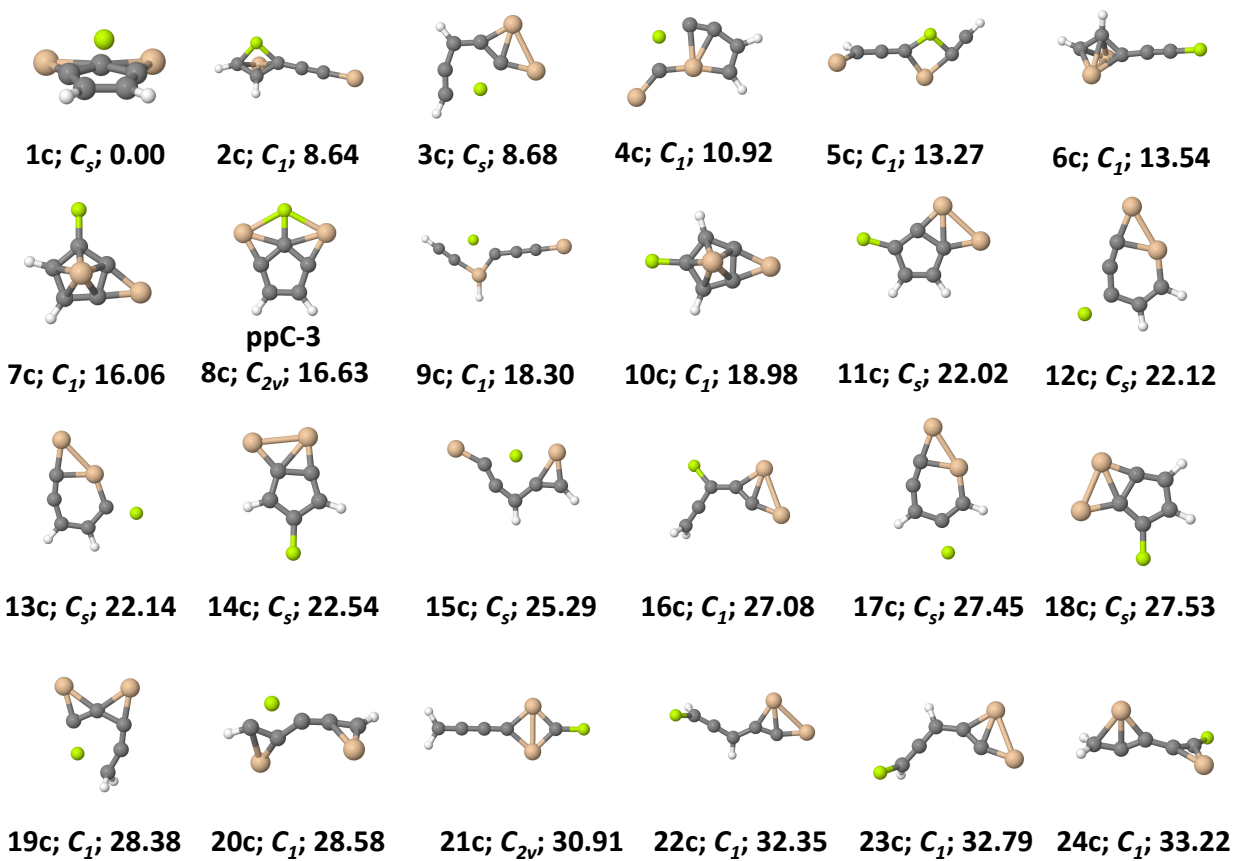

Figure S5: Isomers **1c** to **24c** of  $[\text{BeSi}_2\text{C}_5\text{H}_2]^{2+}$ . ZPVE-corrected relative energies (in  $\text{kcal mol}^{-1}$ ) are calculated at the CBS-QB3 level of theory.

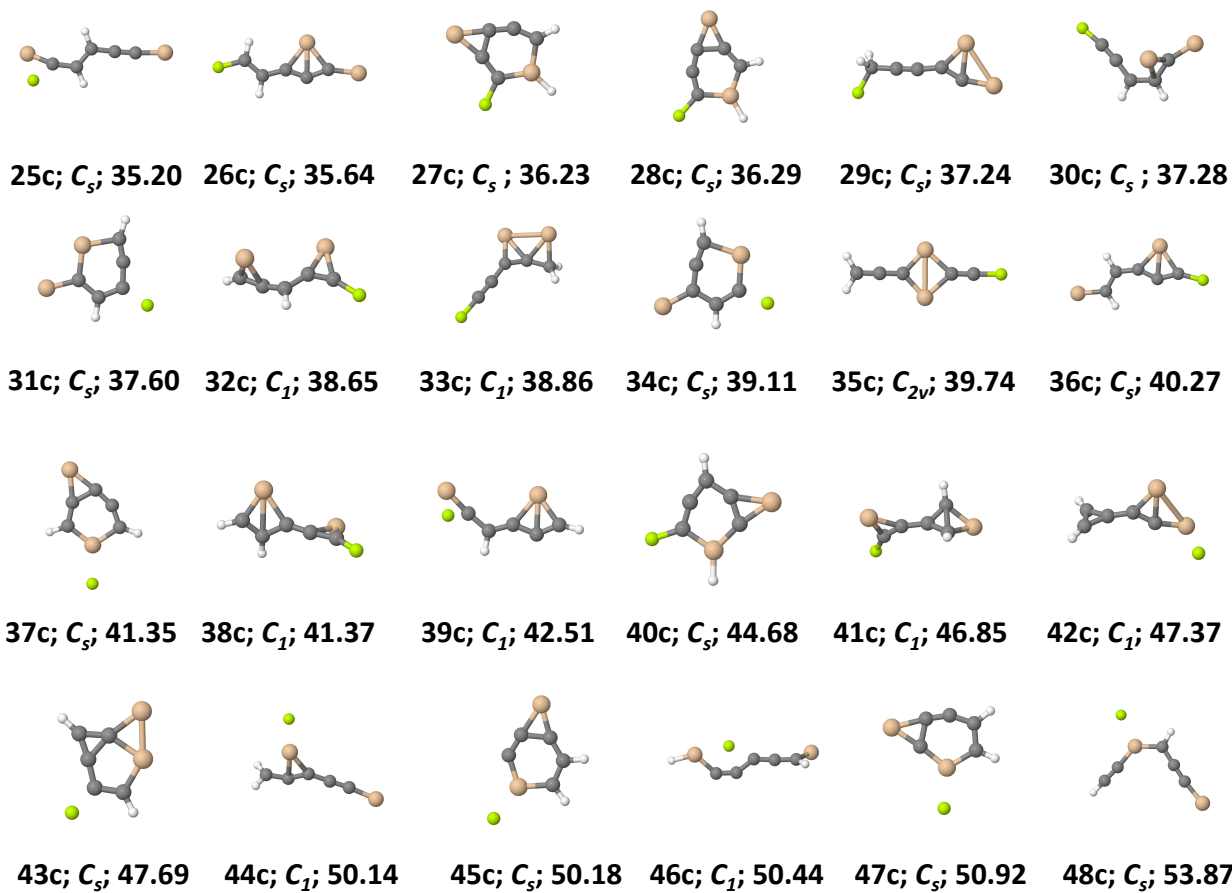

Figure S6: Isomers **25c** to **48c** of  $[\text{BeSi}_2\text{C}_5\text{H}_2]^{2+}$ . ZPVE-corrected relative energies (in  $\text{kcal mol}^{-1}$ ) are calculated at the CBS-QB3 level of theory.

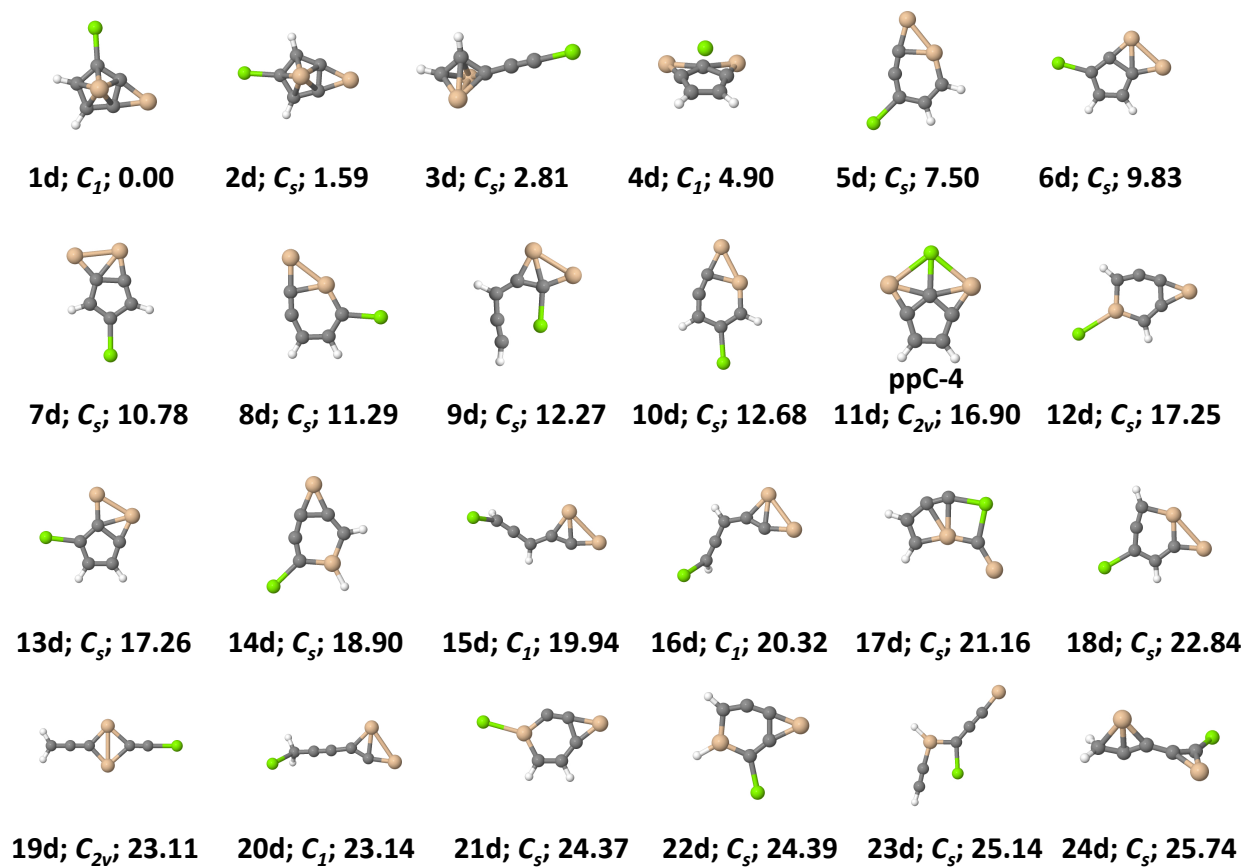

Figure S7: Isomers **1d** to **24d** of  $[\text{MgSi}_2\text{C}_5\text{H}_2]^{2+}$ . ZPVE-corrected relative energies (in kcal mol<sup>-1</sup>) are calculated at the CBS-QB3 level of theory.

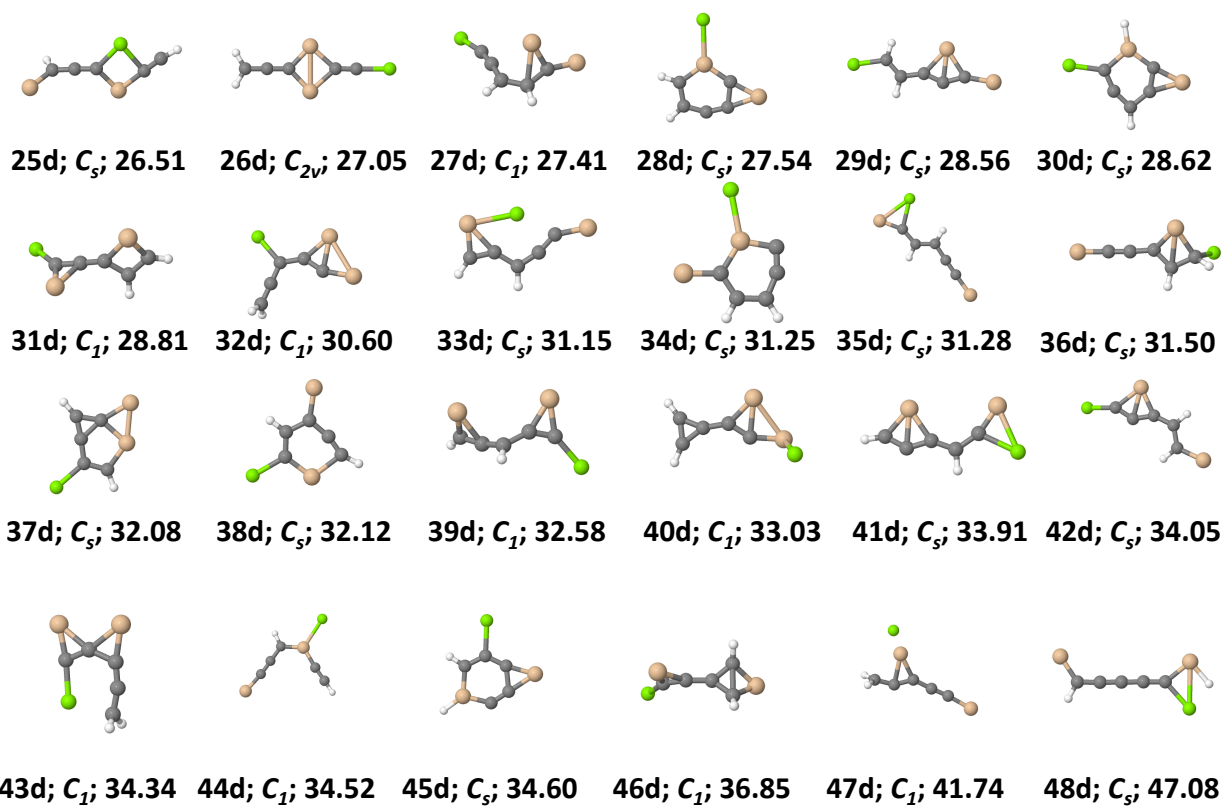

Figure S8: Isomers **25d** to **48d** of  $[\text{MgSi}_2\text{C}_5\text{H}_2]^{2+}$ . ZPVE-corrected relative energies (in  $\text{kcal mol}^{-1}$ ) are calculated at the CBS-QB3 level of theory.

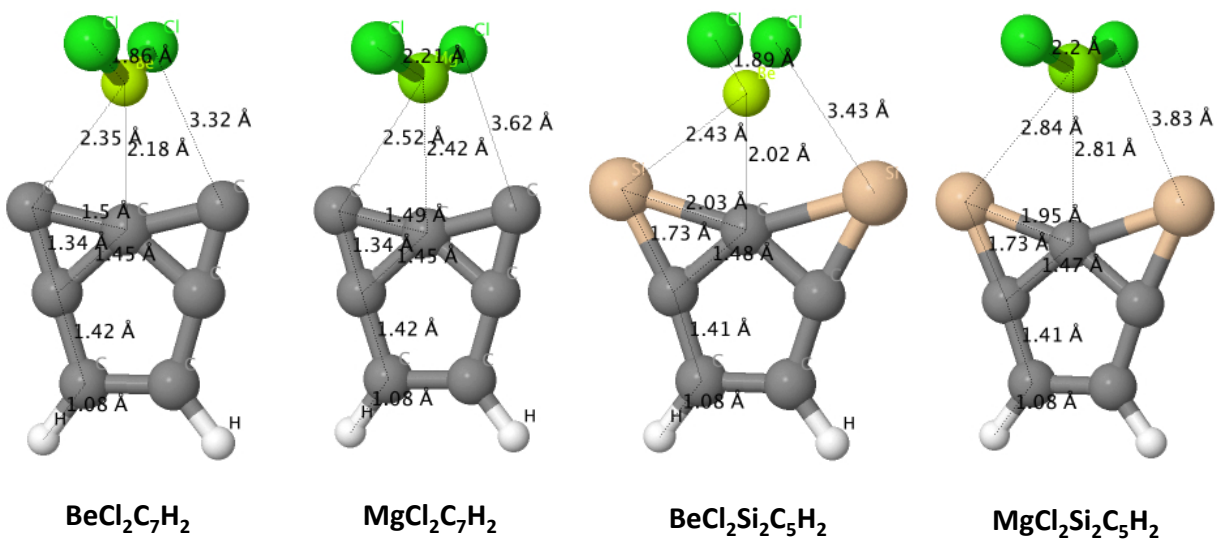

Figure S9: Optimized geometries of neutral  $XCl_2C_7H_2$  and  $XSi_2C_5H_2$  ( $X = Be$  and  $Mg$ ) in their ground electronic states obtained at the PBE0-D3/def2-TZVP level of theory. All isomers are minima.

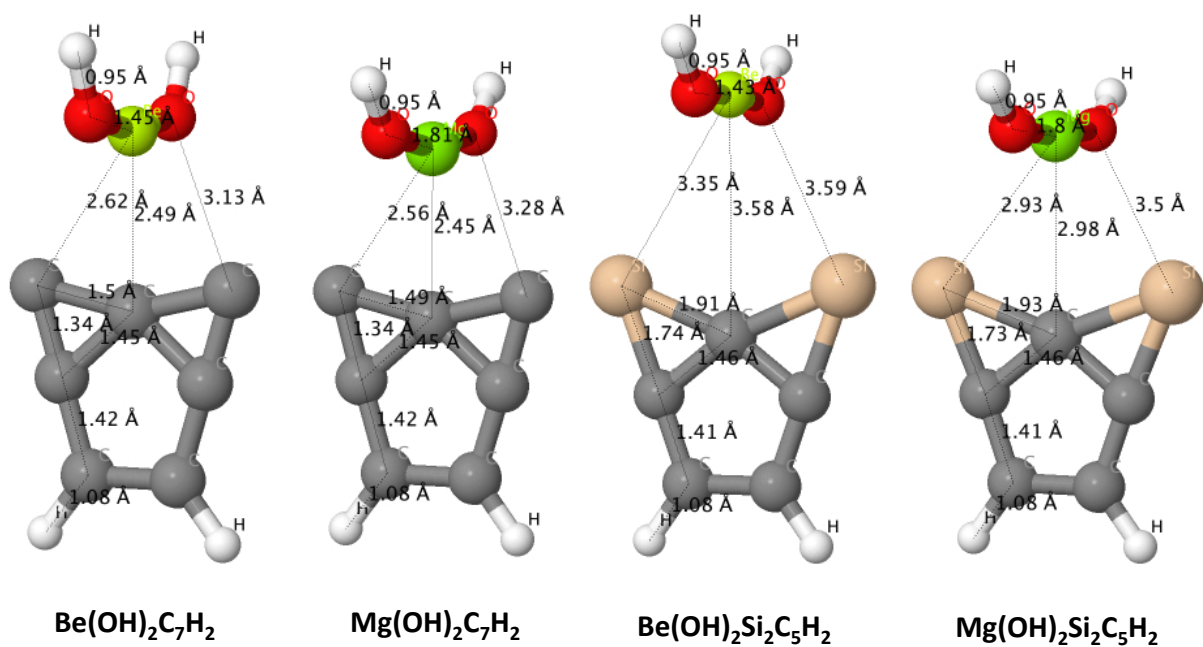

Figure S10: Optimized geometries of neutral  $XCl_2C_7H_2$  and  $XSi_2C_5H_2$  ( $X = Be$  and  $Mg$ ) in their ground electronic states obtained at the PBE0-D3/def2-TZVP level of theory. All isomers are minima.

**Table S1: Electron density descriptors (in a.u.) at the Bond Critical Point (BCP) and Ring Critical Point (RCP) obtained at the B3LYP-D3BJ/6-311++G(2d,2p) level of theory for  $[\text{BeC}_7\text{H}_2]^{2+}$  (ppC-1)**

| BCP & RCP | $K(r_c)$ | $H(r_c)$  | ELF    | $\rho(r_c)$ | $\nabla^2 \rho(r_c)$ | $G(r_c)$ | $V(r_c)$ | $-\frac{G(r_c)}{V(r_c)}$ | $\frac{G(r_c)}{\rho(r_c)}$ |
|-----------|----------|-----------|--------|-------------|----------------------|----------|----------|--------------------------|----------------------------|
| C3-C5     | 0.357    | -0.357    | 0.878  | 0.317       | -0.794               | 0.158    | -0.515   | -0.307                   | 0.498                      |
| C1-C3     | 0.193    | -0.193    | 0.699  | 0.231       | -0.118               | 0.163    | -0.356   | -0.458                   | 0.708                      |
| C1-C5     | 0.243    | -0.243    | 0.818  | 0.263       | -0.39                | 0.146    | -0.389   | -0.374                   | 0.555                      |
| C5-C7     | 0.255    | -0.255    | 0.937  | 0.272       | -0.68                | 0.0848   | -0.34    | -0.249                   | 0.312                      |
| C7-H9     | 0.325    | -0.325    | 0.996  | 0.297       | -1.21                | 0.0234   | -0.348   | -0.067                   | 0.0787                     |
| C1-Be10   | 0.0255   | -0.0255   | 0.108  | 0.0836      | 0.426                | 0.132    | -0.158   | -0.838                   | 1.579                      |
| RCP       | 0.000635 | -0.000635 | 0.0764 | 0.0536      | 0.302                | 0.0761   | -0.0767  | -0.991                   | 1.419                      |
| C6-C7     | 0.328    | -0.328    | 0.946  | 0.317       | -0.904               | 0.102    | -0.429   | -0.236                   | 0.32                       |
| C1-C2     | 0.193    | -0.193    | 0.699  | 0.231       | -0.118               | 0.163    | -0.356   | -0.458                   | 0.708                      |
| C1-C4     | 0.243    | -0.243    | 0.818  | 0.263       | -0.39                | 0.146    | -0.389   | -0.374                   | 0.555                      |
| C4-C6     | 0.255    | -0.255    | 0.937  | 0.272       | -0.68                | 0.0848   | -0.34    | -0.249                   | 0.312                      |
| C2-C4     | 0.357    | -0.357    | 0.878  | 0.317       | -0.794               | 0.158    | -0.515   | -0.307                   | 0.498                      |
| C6-H8     | 0.325    | -0.325    | 0.996  | 0.297       | -1.21                | 0.0234   | -0.348   | -0.067                   | 0.078                      |



**Table S2: Electron density descriptors (in a.u.) at the Bond Critical Point (BCP) and Ring Critical Point (RCP) obtained at the B3LYP-D3BJ/6-311++G(2d,2p) level of theory for  $[\text{MgC}_7\text{H}_2]^{2+}$  (ppC-2)**

| BCP & RCP | $K(r_c)$ | $H(r_c)$ | ELF   | $\rho(r_c)$ | $\nabla^2\rho(r_c)$ | $G(r_c)$ | $V(r_c)$ | $-\frac{G(r_c)}{V(r_c)}$ | $\frac{G(r_c)}{\rho(r_c)}$ |
|-----------|----------|----------|-------|-------------|---------------------|----------|----------|--------------------------|----------------------------|
| C3-C5     | 0.372    | -0.372   | 0.876 | 0.322       | -0.834              | 0.163    | -0.535   | -0.305                   | 0.506                      |
| C1-C3     | 0.208    | -0.208   | 0.75  | 0.239       | -0.22               | 0.153    | -0.361   | -0.423                   | 0.639                      |
| RCP       | -0.003   | 0.003    | 0.048 | 0.034       | 0.203               | 0.047    | -0.044   | -1.077                   | 1.357                      |
| C1-C5     | 0.228    | -0.228   | 0.804 | 0.255       | -0.328              | 0.146    | -0.373   | -0.39                    | 0.57                       |
| C5-C7     | 0.26     | -0.26    | 0.939 | 0.276       | -0.701              | 0.085    | -0.345   | -0.246                   | 0.308                      |
| C7-H9     | 0.324    | -0.324   | 0.996 | 0.297       | -1.19               | 0.025    | -0.349   | -0.072                   | 0.084                      |
| C1-Mg10   | -0.004   | 0.004    | 0.042 | 0.035       | 0.051               | -0.047   | -0.047   | 1.466                    | -1.344                     |
| RCP       | -0.0034  | 0.0034   | 0.048 | 0.034       | 0.203               | 0.047    | -0.044   | -1.077                   | 1.357                      |
| RCP       | 0.0007   | -0.0007  | 0.078 | 0.054       | 0.3                 | 0.075    | -0.076   | -0.989                   | 1.403                      |
| C6-C7     | 0.34     | -0.34    | 0.943 | 0.322       | -0.933              | 0.107    | -0.446   | -0.238                   | 0.33                       |
| C1-C2     | 0.208    | -0.208   | 0.75  | 0.239       | -0.22               | 0.153    | -0.361   | -0.423                   | 0.639                      |
| C1-C4     | 0.228    | -0.228   | 0.804 | 0.255       | -0.328              | 0.146    | -0.373   | -0.39                    | 0.57                       |
| C4-C6     | 0.26     | -0.26    | 0.939 | 0.276       | -0.701              | 0.085    | -0.345   | -0.246                   | 0.308                      |
| C2-C4     | 0.372    | -0.372   | 0.876 | 0.322       | -0.834              | 0.163    | -0.535   | -0.305                   | 0.506                      |
| C6-H8     | 0.324    | -0.324   | 0.996 | 0.297       | -1.19               | 0.025    | -0.349   | -0.072                   | 0.084                      |
| C2-Mg10   | -0.003   | 0.003    | 0.05  | 0.034       | 0.198               | 0.046    | -0.043   | -1.07                    | 1.325                      |
| RCP       | 0.135    | -0.135   | 0.613 | 0.229       | 0.242               | 0.195    | -0.33    | -0.591                   | 0.852                      |
| C3-Mg10   | -0.003   | 0.003    | 0.05  | 0.034       | 0.198               | 0.046    | -0.043   | -1.07                    | 1.325                      |
| RCP       | 0.135    | -0.135   | 0.613 | 0.229       | 0.242               | 0.195    | -0.33    | -0.591                   | 0.852                      |

**Table S3:** Electron density descriptors (in a.u.) at the Bond Critical Point (BCP) and Ring Critical Point (RCP) obtained at the B3LYP-D3BJ/6-311++G(2d,2p) level of theory for  $[\text{BeSi}_2\text{C}_5\text{H}_2]^{2+}$  (ppC-3)

| BCP & RCP | $K(r_c)$  | $H(r_c)$   | ELF   | $\rho(r_c)$ | $\nabla^2\rho(r_c)$ | $G(r_c)$ | $V(r_c)$ | $-\frac{G(r_c)}{V(r_c)}$ | $\frac{G(r_c)}{\rho(r_c)}$ |
|-----------|-----------|------------|-------|-------------|---------------------|----------|----------|--------------------------|----------------------------|
| Si3-C5    | 0.09      | -0.09      | 0.265 | 0.134       | 0.314               | 0.169    | -0.259   | -0.651                   | 1.254                      |
| C1-C5     | 0.2       | -0.2       | 0.891 | 0.242       | -0.425              | 0.094    | -0.294   | -0.319                   | 0.389                      |
| C5-C7     | 0.312     | -0.312     | 0.943 | 0.305       | -0.859              | 0.097    | -0.409   | -0.237                   | 0.318                      |
| C7-H9     | 0.322     | -0.322     | 0.995 | 0.297       | -1.18               | 0.028    | -0.35    | -0.08                    | 0.094                      |
| C1-Be10   | 0.045     | -0.0451    | 0.167 | 0.101       | 0.379               | 0.14     | -0.185   | -0.756                   | 1.388                      |
| RCP       | 0.0000721 | -0.0000721 | 0.076 | 0.052       | 0.29                | 0.072    | -0.072   | -0.999                   | 1.391                      |
| C6-C7     | 0.322     | -0.322     | 0.946 | 0.314       | -0.889              | 0.099    | -0.421   | -0.236                   | 0.317                      |
| C1-C4     | 0.2       | -0.2       | 0.891 | 0.242       | -0.425              | 0.094    | -0.294   | -0.319                   | 0.389                      |
| C4-C6     | 0.312     | -0.312     | 0.943 | 0.305       | -0.859              | 0.097    | -0.409   | -0.237                   | 0.318                      |
| Si2-C4    | 0.09      | -0.09      | 0.265 | 0.134       | 0.314               | 0.169    | -0.259   | -0.651                   | 1.254                      |
| C6-H8     | 0.322     | -0.322     | 0.995 | 0.297       | -1.18               | 0.028    | -0.35    | -0.08                    | 0.094                      |

**Table S4:** Electron density descriptors (in a.u.) at the Bond Critical Point (BCP) and Ring Critical Point (RCP) obtained at the B3LYP-D3BJ/6-311++G(2d,2p) level of theory for  $\text{MgSi}_2\text{C}_5\text{H}_2^+$  (ppC-4)

| BCP & RCP | $K(r_c)$ | $H(r_c)$ | ELF   | $\rho(r_c)$ | $\nabla^2\rho(r_c)$ | $G(r_c)$ | $V(r_c)$ | $-\frac{G(r_c)}{V(r_c)}$ | $\frac{G(r_c)}{\rho(r_c)}$ |
|-----------|----------|----------|-------|-------------|---------------------|----------|----------|--------------------------|----------------------------|
| C4-Si8    | 0        | -0.094   | 0.262 | 0.139       | 0.346               | 0.181    | -0.275   | -0.657                   | 1.294                      |
| C3-H6     | 0.321    | -0.321   | 0.994 | 0.296       | -1.17               | 0.029    | -0.351   | -0.085                   | 0.1                        |
| C3-C4     | 0.293    | -0.293   | 0.945 | 0.296       | -0.807              | 0.091    | -0.384   | -0.237                   | 0.308                      |
| C4-C5     | 0.211    | -0.211   | 0.896 | 0.248       | -0.46               | 0.095    | -0.307   | -0.312                   | 0.386                      |
| C5-Mg10   | 0.0014   | -0.001   | 0.091 | 0.046       | 0.21                | 0.054    | -0.056   | -0.967                   | 1.167                      |
| RCP       | 0.00003  | -0.00003 | 0.075 | 0.052       | 0.297               | 0.074    | -0.074   | -1                       | 1.413                      |
| C1-C3     | 0.343    | -0.343   | 0.942 | 0.323       | -0.939              | 0.108    | -0.451   | -0.239                   | 0.334                      |
| C2-C5     | 0.211    | -0.211   | 0.896 | 0.248       | -0.46               | 0.095    | -0.307   | -0.312                   | 0.386                      |
| C1-C2     | 0.293    | -0.293   | 0.945 | 0.296       | -0.807              | 0.091    | -0.384   | -0.237                   | 0.308                      |
| C1-H7     | 0.321    | -0.321   | 0.994 | 0.296       | -1.17               | 0.029    | -0.351   | -0.085                   | 0.1                        |
| C2-Si9    | 0.094    | -0.094   | 0.262 | 0.139       | 0.346               | 0.181    | -0.275   | -0.657                   | 1.294                      |

A sample input file for  $[\text{BeC}_7\text{H}_2]^{2+}$  is given below.

```
%mem=10GB
%NprocShared=16
%chk=bec7h2.chk
#P B3LYP/6-311++G(2d,2p) EmpiricalDispersion=GD3BJ pop=nboread ginput
```

AIM\_analysis

```
2 1
C    3.284481    -0.000000    1.000000
C    3.774452    -0.000000    2.384559
C    3.774452    -0.000000   -0.384559
C    2.440165     0.000000    2.162450
C    2.440165   -0.000000   -0.162450
C    1.072583     0.000000    1.696429
C    1.072583     0.000000    0.303571
H    0.201606     0.000000    2.340235
H    0.201606     0.000000   -0.340235
Be   4.961606   -0.000000    1.000000
```

Cartesian coordinates of optimized geometries of  $[\text{BeC}_7\text{H}_2]^{2+}$  at the B3LYP-D3BJ/6-311++G(2d,2p) level of theory.

```
10
scf done: -281.732956
C    3.284481    -0.000000    1.000000
C    3.774452    -0.000000    2.384559
```

|    |          |           |           |
|----|----------|-----------|-----------|
| C  | 3.774452 | -0.000000 | -0.384559 |
| C  | 2.440165 | 0.000000  | 2.162450  |
| C  | 2.440165 | -0.000000 | -0.162450 |
| C  | 1.072583 | 0.000000  | 1.696429  |
| C  | 1.072583 | 0.000000  | 0.303571  |
| H  | 0.201606 | 0.000000  | 2.340235  |
| H  | 0.201606 | 0.000000  | -0.340235 |
| Be | 4.961606 | -0.000000 | 1.000000  |

Cartesian coordinates of optimized geometries of  $[\text{BeSi}_2\text{C}_5\text{H}_2]^{2+}$  at the B3LYP-D3BJ/6-311++G(2d,2p) level of theory.

10

scf done: -784.749628

|    |          |           |           |
|----|----------|-----------|-----------|
| C  | 3.377945 | -0.000000 | 1.000000  |
| Si | 3.941053 | 0.000000  | 2.995762  |
| Si | 3.941053 | -0.000000 | -0.995762 |
| C  | 2.419455 | 0.000000  | 2.135647  |
| C  | 2.419455 | -0.000000 | -0.135647 |
| C  | 1.090025 | 0.000000  | 1.697549  |
| C  | 1.090025 | -0.000000 | 0.302451  |
| H  | 0.222737 | 0.000000  | 2.340813  |
| H  | 0.222737 | -0.000000 | -0.340813 |
| Be | 5.031502 | -0.000000 | 1.000000  |

Cartesian coordinates of optimized geometries of  $[\text{MgC}_7\text{H}_2]^{2+}$  at the B3LYP-D3BJ/6-311++G(2d,2p) level of theory.

10

scf done: -467.176714

|    |          |           |           |
|----|----------|-----------|-----------|
| C  | 3.275039 | -0.000000 | 1.000000  |
| C  | 3.701839 | -0.000000 | 2.396746  |
| C  | 3.701839 | -0.000000 | -0.396746 |
| C  | 2.381837 | 0.000000  | 2.139334  |
| C  | 2.381837 | 0.000000  | -0.139334 |
| C  | 1.013388 | 0.000000  | 1.691649  |
| C  | 1.013388 | 0.000000  | 0.308351  |
| H  | 0.148033 | 0.000000  | 2.340259  |
| H  | 0.148033 | 0.000000  | -0.340259 |
| Mg | 5.458464 | -0.000000 | 1.000000  |

Cartesian coordinates of optimized geometries of  $[\text{MgSi}_2\text{C}_5\text{H}_2]^{2+}$  at the B3LYP-D3BJ/6-311++G(2d,2p) level of theory.

10

scf done: -970.153405

|    |           |           |           |
|----|-----------|-----------|-----------|
| C  | -5.535448 | 0.868391  | -0.186234 |
| C  | -4.179726 | 0.488024  | -0.307436 |
| C  | -6.297254 | -0.279969 | -0.131651 |
| C  | -5.424231 | -1.387988 | -0.218114 |
| C  | -4.012326 | -0.977308 | -0.336035 |
| H  | -7.370248 | -0.342837 | -0.039373 |
| H  | -5.891806 | 1.885800  | -0.145348 |
| Si | -4.750313 | -2.979670 | -0.291196 |
| Si | -2.456121 | 0.478690  | -0.455964 |
| Mg | -2.215747 | -2.177203 | -0.505538 |

**Table S5: Computed energies of alkali and alkaline-earth metal ions at different levels.**

| Ions                          | B3LYP/6-311++G(2d,2p) | TPSSh/6-311++G(2d,2p) |
|-------------------------------|-----------------------|-----------------------|
|                               | a.u                   | a.u                   |
| Li <sup>+</sup>               | -7.2849178            | -7.2854225            |
| Na <sup>+</sup>               | -162.0875669          | -162.0851292          |
| K <sup>+</sup>                | -599.7609747          | -599.7635368          |
| <sup>a</sup> Rb <sup>+</sup>  | -23.7057810           | -23.6979130           |
| <sup>a</sup> Cs <sup>+</sup>  | -19.7315209           | -19.7309192           |
| Be <sup>2+</sup>              | -13.6528851           | -13.6611035           |
| Mg <sup>2+</sup>              | -199.2410012          | -199.2454218          |
| Ca <sup>2+</sup>              | -676.9057654          | -676.9136491          |
| <sup>a</sup> Sr <sup>2+</sup> | -29.8115699           | -29.8034249           |
| <sup>a</sup> Ba <sup>2+</sup> | -24.6517711           | -24.6513191           |
|                               | PBE0/def2-TZVP        | TPSSh/def2-TZVP       |
|                               | a.u                   | a.u                   |
| Li <sup>+</sup>               | -7.2623925            | -7.2859369            |
| Na <sup>+</sup>               | -161.9813348          | -162.0915886          |
| K <sup>+</sup>                | -599.5782515          | -599.7643897          |
| Rb <sup>+</sup>               | -23.9272886           | -23.9320449           |
| Cs <sup>+</sup>               | -19.9966386           | -20.0041888           |
| Be <sup>2+</sup>              | -13.6281011           | -13.6617778           |
| Mg <sup>2+</sup>              | -199.1241103          | -199.2452705          |
| Ca <sup>2+</sup>              | -676.7193793          | -676.9154249          |
| Sr <sup>2+</sup>              | -30.0651628           | -30.0722600           |
| Ba <sup>2+</sup>              | -24.8923080           | -24.9064468           |

<sup>a</sup> Calculations are done with LANL2DZ ECP.

**Table S6: Computed energies of C<sub>7</sub>H<sub>2</sub> and Si<sub>2</sub>C<sub>5</sub>H<sub>2</sub> at different levels.**

| Species                                       | Energy       | ZPVE     | E+ZPVE      | NImag | Level                      |
|-----------------------------------------------|--------------|----------|-------------|-------|----------------------------|
|                                               | a.u          | a.u      | a.u         |       |                            |
| C <sub>7</sub> H <sub>2</sub>                 | -267.6981864 | 0.053703 | -267.644484 | 0     | B3LYP/6-311++G(2d,2p)      |
| C <sub>7</sub> H <sub>2</sub>                 | -267.7143678 | 0.053761 | -267.660606 | 0     | B3LYP-D3BJ/6-311++G(2d,2p) |
| C <sub>7</sub> H <sub>2</sub>                 | -267.7309604 | 0.053793 | -267.677167 | 0     | TPSSh/6-311++G(2d,2p)      |
| C <sub>7</sub> H <sub>2</sub>                 | -267.7415055 | 0.053829 | -267.687677 | 0     | TPSSh-D3BJ/6-311++G(2d,2p) |
| C <sub>7</sub> H <sub>2</sub>                 | -267.4069299 | 0.054893 | -267.352037 | 0     | PBE0-D3/def2-TZVP          |
| C <sub>7</sub> H <sub>2</sub>                 | -267.7654245 | 0.054107 | -267.711317 | 0     | TPSSh-D3BJ/def2-TZVP       |
| Si <sub>2</sub> C <sub>5</sub> H <sub>2</sub> | -770.6783795 | 0.049725 | -770.628654 | 0     | B3LYP/6-311++G(2d,2p)      |
| Si <sub>2</sub> C <sub>5</sub> H <sub>2</sub> | -770.7025997 | 0.049832 | -770.652768 | 0     | B3LYP-D3BJ/6-311++G(2d,2p) |
| Si <sub>2</sub> C <sub>5</sub> H <sub>2</sub> | -770.6883995 | 0.049733 | -770.638667 | 0     | TPSSh/6-311++G(2d,2p)      |
| Si <sub>2</sub> C <sub>5</sub> H <sub>2</sub> | -770.7042208 | 0.049788 | -770.654433 | 0     | TPSSh-D3BJ/6-311++G(2d,2p) |
| Si <sub>2</sub> C <sub>5</sub> H <sub>2</sub> | -770.1942060 | 0.050514 | -770.143692 | 0     | PBE0-D3/def2-TZVP          |
| Si <sub>2</sub> C <sub>5</sub> H <sub>2</sub> | -770.7229473 | 0.049915 | -770.673033 | 0     | TPSSh-D3BJ/def2-TZVP       |



**Table S7: Computed energies of  $M^+-C_7H_2$  at different levels.**

| Species         | Energy       | ZPVE     | E+ZPVE      | NImag | Level                      |
|-----------------|--------------|----------|-------------|-------|----------------------------|
|                 | a.u          | a.u      | a.u         |       |                            |
| $Li^+-C_7H_2$   | -275.0528128 | 0.055819 | -274.996994 | 0     | B3LYP/6-311++G(2d,2p)      |
| $Li^+-C_7H_2$   | -275.0727011 | 0.055932 | -275.016769 | 0     | B3LYP-D3BJ/6-311++G(2d,2p) |
| $Li^+-C_7H_2$   | -275.0859395 | 0.055950 | -275.029989 | 0     | TPSSh/6-311++G(2d,2p)      |
| $Li^+-C_7H_2$   | -275.0988982 | 0.056019 | -275.042879 | 0     | TPSSh-D3BJ/6-311++G(2d,2p) |
| $Li^+-C_7H_2$   | -274.7399222 | 0.057041 | -274.682881 | 0     | PBE0-D3/def2-TZVP          |
| $Li^+-C_7H_2$   | -275.1234595 | 0.056313 | -275.067147 | 0     | TPSSh-D3BJ/def2-TZVP       |
| $Na^+-C_7H_2$   | -429.8393383 | 0.055151 | -429.784188 | 0     | B3LYP/6-311++G(2d,2p)      |
| $Na^+-C_7H_2$   | -429.8595976 | 0.055236 | -429.804362 | 0     | B3LYP-D3BJ/6-311++G(2d,2p) |
| $Na^+-C_7H_2$   | -429.8690981 | 0.055263 | -429.813835 | 0     | TPSSh/6-311++G(2d,2p)      |
| $Na^+-C_7H_2$   | -429.8822881 | 0.055294 | -429.826994 | 0     | TPSSh-D3BJ/6-311++G(2d,2p) |
| $Na^+-C_7H_2$   | -429.4434626 | 0.056357 | -429.387106 | 0     | PBE0-D3/def2-TZVP          |
| $Na^+-C_7H_2$   | -429.9128682 | 0.055596 | -429.857273 | 0     | TPSSh-D3BJ/def2-TZVP       |
| $K^+-C_7H_2$    | -867.5006320 | 0.054914 | -867.445718 | 0     | B3LYP/6-311++G(2d,2p)      |
| $K^+-C_7H_2$    | -867.5211400 | 0.055016 | -867.466124 | 0     | B3LYP-D3BJ/6-311++G(2d,2p) |
| $K^+-C_7H_2$    | -867.5360337 | 0.055020 | -867.481014 | 0     | TPSSh/6-311++G(2d,2p)      |
| $K^+-C_7H_2$    | -867.5494289 | 0.055071 | -867.494358 | 0     | TPSSh-D3BJ/6-311++G(2d,2p) |
| $K^+-C_7H_2$    | -867.0293521 | 0.056105 | -866.973247 | 0     | PBE0-D3/def2-TZVP          |
| $K^+-C_7H_2$    | -867.5743104 | 0.055362 | -867.518949 | 0     | TPSSh-D3BJ/def2-TZVP       |
| $^aRb^+-C_7H_2$ | -291.4387068 | 0.054727 | -291.383980 | 0     | B3LYP/6-311++G(2d,2p)      |
| $^aRb^+-C_7H_2$ | -291.4590538 | 0.054819 | -291.404235 | 0     | B3LYP-D3BJ/6-311++G(2d,2p) |
| $^aRb^+-C_7H_2$ | -291.4639233 | 0.054833 | -291.409090 | 0     | TPSSh/6-311++G(2d,2p)      |
| $^aRb^+-C_7H_2$ | -291.4772259 | 0.054885 | -291.422341 | 0     | TPSSh-D3BJ/6-311++G(2d,2p) |
| $Rb^+-C_7H_2$   | -291.3745346 | 0.055935 | -291.318599 | 0     | PBE0-D3/def2-TZVP          |
| $Rb^+-C_7H_2$   | -291.7377074 | 0.055194 | -291.682514 | 0     | TPSSh-D3BJ/def2-TZVP       |
| $^aCs^+-C_7H_2$ | -287.4606623 | 0.054639 | -287.406023 | 0     | B3LYP/6-311++G(2d,2p)      |
| $^aCs^+-C_7H_2$ | -287.4809117 | 0.054733 | -287.426179 | 0     | B3LYP-D3BJ/6-311++G(2d,2p) |
| $^aCs^+-C_7H_2$ | -287.4934166 | 0.054748 | -287.438669 | 0     | TPSSh/6-311++G(2d,2p)      |
| $^aCs^+-C_7H_2$ | -287.5066763 | 0.054796 | -287.451880 | 0     | TPSSh-D3BJ/6-311++G(2d,2p) |
| $Cs^+-C_7H_2$   | -287.4409686 | 0.055830 | -287.385139 | 0     | PBE0-D3/def2-TZVP          |
| $Cs^+-C_7H_2$   | -287.8066632 | 0.055096 | -287.751567 | 0     | TPSSh-D3BJ/def2-TZVP       |

<sup>a</sup> Calculations are done with LANL2DZ ECP for the metal.

**Table S8: Computed energies of  $M^{2+}$ - $C_7H_2$  at different levels.**

| Species                                                      | Energy       | ZPVE     | E+ZPVE      | NImag | Level                      |
|--------------------------------------------------------------|--------------|----------|-------------|-------|----------------------------|
|                                                              | a.u          | a.u      | a.u         |       |                            |
| Be <sup>2+</sup> -C <sub>7</sub> H <sub>2</sub>              | -281.7121654 | 0.057510 | -281.654655 | 1     | B3LYP/6-311++G(2d,2p)      |
| Be <sup>2+</sup> -C <sub>7</sub> H <sub>2</sub>              | -281.7329559 | 0.057594 | -281.675362 | 1     | B3LYP-D3BJ/6-311++G(2d,2p) |
| Be <sup>2+</sup> -C <sub>7</sub> H <sub>2</sub>              | -281.7532073 | 0.057639 | -281.695568 | 1     | TPSSh/6-311++G(2d,2p)      |
| Be <sup>2+</sup> -C <sub>7</sub> H <sub>2</sub>              | -281.7667520 | 0.057687 | -281.709065 | 1     | TPSSh-D3BJ/6-311++G(2d,2p) |
| Be <sup>2+</sup> -C <sub>7</sub> H <sub>2</sub>              | -281.3947428 | 0.058805 | -281.335938 | 0     | PBE0-D3/def2-TZVP          |
| Be <sup>2+</sup> -C <sub>7</sub> H <sub>2</sub>              | -281.7890821 | 0.058016 | -281.731066 | 0     | TPSSh-D3BJ/def2-TZVP       |
| Mg <sup>2+</sup> -C <sub>7</sub> H <sub>2</sub>              | -467.1548319 | 0.056302 | -467.098530 | 0     | B3LYP/6-311++G(2d,2p)      |
| Mg <sup>2+</sup> -C <sub>7</sub> H <sub>2</sub>              | -467.1767142 | 0.056390 | -467.120324 | 0     | B3LYP-D3BJ/6-311++G(2d,2p) |
| Mg <sup>2+</sup> -C <sub>7</sub> H <sub>2</sub>              | -467.1907123 | 0.056436 | -467.134277 | 0     | TPSSh/6-311++G(2d,2p)      |
| Mg <sup>2+</sup> -C <sub>7</sub> H <sub>2</sub>              | -467.2049451 | 0.056480 | -467.148465 | 0     | TPSSh-D3BJ/6-311++G(2d,2p) |
| Mg <sup>2+</sup> -C <sub>7</sub> H <sub>2</sub>              | -466.7487407 | 0.057463 | -466.691278 | 0     | PBE0-D3/def2-TZVP          |
| Mg <sup>2+</sup> -C <sub>7</sub> H <sub>2</sub>              | -467.2300413 | 0.056742 | -467.173299 | 0     | TPSSh-D3BJ/def2-TZVP       |
| Ca <sup>2+</sup> -C <sub>7</sub> H <sub>2</sub>              | -944.7647726 | 0.055802 | -944.708971 | 0     | B3LYP/6-311++G(2d,2p)      |
| Ca <sup>2+</sup> -C <sub>7</sub> H <sub>2</sub>              | -944.7870706 | 0.055893 | -944.731178 | 0     | B3LYP-D3BJ/6-311++G(2d,2p) |
| Ca <sup>2+</sup> -C <sub>7</sub> H <sub>2</sub>              | -944.8076027 | 0.055984 | -944.751619 | 0     | TPSSh/6-311++G(2d,2p)      |
| Ca <sup>2+</sup> -C <sub>7</sub> H <sub>2</sub>              | -944.8220842 | 0.056031 | -944.766053 | 0     | TPSSh-D3BJ/6-311++G(2d,2p) |
| Ca <sup>2+</sup> -C <sub>7</sub> H <sub>2</sub>              | -944.2908125 | 0.057039 | -944.233773 | 0     | PBE0-D3/def2-TZVP          |
| Ca <sup>2+</sup> -C <sub>7</sub> H <sub>2</sub>              | -944.8486885 | 0.056337 | -944.792352 | 0     | TPSSh-D3BJ/def2-TZVP       |
| <sup>a</sup> Sr <sup>2+</sup> -C <sub>7</sub> H <sub>2</sub> | -297.6282748 | 0.055672 | -297.572602 | 0     | B3LYP/6-311++G(2d,2p)      |
| <sup>a</sup> Sr <sup>2+</sup> -C <sub>7</sub> H <sub>2</sub> | -297.6502728 | 0.055766 | -297.594507 | 0     | B3LYP-D3BJ/6-311++G(2d,2p) |
| <sup>a</sup> Sr <sup>2+</sup> -C <sub>7</sub> H <sub>2</sub> | -297.6540899 | 0.055842 | -297.598247 | 0     | TPSSh/6-311++G(2d,2p)      |
| <sup>a</sup> Sr <sup>2+</sup> -C <sub>7</sub> H <sub>2</sub> | -297.6683802 | 0.055891 | -297.612489 | 0     | TPSSh-D3BJ/6-311++G(2d,2p) |
| Sr <sup>2+</sup> -C <sub>7</sub> H <sub>2</sub>              | -297.6128002 | 0.056709 | -297.556091 | 0     | PBE0-D3/def2-TZVP          |
| Sr <sup>2+</sup> -C <sub>7</sub> H <sub>2</sub>              | -297.9803110 | 0.056012 | -297.924299 | 0     | TPSSh-D3BJ/def2-TZVP       |
| <sup>a</sup> Ba <sup>2+</sup> -C <sub>7</sub> H <sub>2</sub> | -292.4523520 | 0.055477 | -292.396875 | 0     | B3LYP/6-311++G(2d,2p)      |
| <sup>a</sup> Ba <sup>2+</sup> -C <sub>7</sub> H <sub>2</sub> | -292.4744870 | 0.055568 | -292.418919 | 0     | B3LYP-D3BJ/6-311++G(2d,2p) |
| <sup>a</sup> Ba <sup>2+</sup> -C <sub>7</sub> H <sub>2</sub> | -292.4865959 | 0.055658 | -292.430938 | 0     | TPSSh/6-311++G(2d,2p)      |
| <sup>a</sup> Ba <sup>2+</sup> -C <sub>7</sub> H <sub>2</sub> | -292.5009711 | 0.055706 | -292.445265 | 0     | TPSSh-D3BJ/6-311++G(2d,2p) |
| Ba <sup>2+</sup> -C <sub>7</sub> H <sub>2</sub>              | -292.4223211 | 0.056519 | -292.365802 | 0     | PBE0-D3/def2-TZVP          |
| Ba <sup>2+</sup> -C <sub>7</sub> H <sub>2</sub>              | -292.7967244 | 0.055830 | -292.740895 | 0     | TPSSh-D3BJ/def2-TZVP       |

<sup>a</sup> Calculations are done with LANL2DZ ECP for the metal.

**Table S9: Computed energies of  $M^+-Si_2C_5H_2$  at different levels.**

| Species             | Energy        | ZPVE     | E+ZPVE       | NImag | Level                      |
|---------------------|---------------|----------|--------------|-------|----------------------------|
|                     | a.u           | a.u      | a.u          |       |                            |
| $Li^+-Si_2C_5H_2$   | -778.0089414  | 0.051391 | -777.957550  | 0     | B3LYP/6-311++G(2d,2p)      |
| $Li^+-Si_2C_5H_2$   | -778.0380362  | 0.051521 | -777.986515  | 0     | B3LYP-D3BJ/6-311++G(2d,2p) |
| $Li^+-Si_2C_5H_2$   | -778.0204889  | 0.051421 | -777.969068  | 0     | TPSSh/6-311++G(2d,2p)      |
| $Li^+-Si_2C_5H_2$   | -778.0394544  | 0.051486 | -777.987969  | 0     | TPSSh-D3BJ/6-311++G(2d,2p) |
| $Li^+-Si_2C_5H_2$   | -777.5018441  | 0.052164 | -777.449680  | 0     | PBE0-D3/def2-TZVP          |
| $Li^+-Si_2C_5H_2$   | -778.0572873  | 0.051571 | -778.005716  | 0     | TPSSh-D3BJ/def2-TZVP       |
| $Na^+-Si_2C_5H_2$   | -932.7918108  | 0.050452 | -932.741359  | 0     | B3LYP/6-311++G(2d,2p)      |
| $Na^+-Si_2C_5H_2$   | -932.8214030  | 0.050579 | -932.770824  | 0     | B3LYP-D3BJ/6-311++G(2d,2p) |
| $Na^+-Si_2C_5H_2$   | -932.8005445  | 0.050500 | -932.750044  | 0     | TPSSh/6-311++G(2d,2p)      |
| $Na^+-Si_2C_5H_2$   | -932.8197656  | 0.050563 | -932.769203  | 0     | TPSSh-D3BJ/6-311++G(2d,2p) |
| $Na^+-Si_2C_5H_2$   | -932.2026740  | 0.051240 | -932.151434  | 0     | PBE0-D3/def2-TZVP          |
| $Na^+-Si_2C_5H_2$   | -932.8443755  | 0.050664 | -932.793712  | 0     | TPSSh-D3BJ/def2-TZVP       |
| $K^+-Si_2C_5H_2$    | -1370.4539894 | 0.050282 | -1370.403707 | 0     | B3LYP/6-311++G(2d,2p)      |
| $K^+-Si_2C_5H_2$    | -1370.4837144 | 0.050422 | -1370.433292 | 0     | B3LYP-D3BJ/6-311++G(2d,2p) |
| $K^+-Si_2C_5H_2$    | -1370.4683391 | 0.050314 | -1370.418025 | 0     | TPSSh/6-311++G(2d,2p)      |
| $K^+-Si_2C_5H_2$    | -1370.4876908 | 0.050386 | -1370.437305 | 0     | TPSSh-D3BJ/6-311++G(2d,2p) |
| $K^+-Si_2C_5H_2$    | -1369.7898983 | 0.051074 | -1369.738825 | 0     | PBE0-D3/def2-TZVP          |
| $K^+-Si_2C_5H_2$    | -1370.5070248 | 0.050494 | -1370.456531 | 0     | TPSSh-D3BJ/def2-TZVP       |
| $^aRb^+-Si_2C_5H_2$ | -794.3938171  | 0.050176 | -794.343642  | 0     | B3LYP/6-311++G(2d,2p)      |
| $^aRb^+-Si_2C_5H_2$ | -794.4230479  | 0.050289 | -794.372759  | 0     | B3LYP-D3BJ/6-311++G(2d,2p) |
| $^aRb^+-Si_2C_5H_2$ | -794.3977370  | 0.050220 | -794.347516  | 0     | TPSSh/6-311++G(2d,2p)      |
| $^aRb^+-Si_2C_5H_2$ | -794.4168082  | 0.050276 | -794.366533  | 0     | TPSSh-D3BJ/6-311++G(2d,2p) |
| $Rb^+-Si_2C_5H_2$   | -794.1364761  | 0.050977 | -794.085499  | 0     | PBE0-D3/def2-TZVP          |
| $Rb^+-Si_2C_5H_2$   | -794.6716493  | 0.050394 | -794.621255  | 0     | TPSSh-D3BJ/def2-TZVP       |
| $^aCs^+-Si_2C_5H_2$ | -790.4174002  | 0.050126 | -790.367275  | 0     | B3LYP/6-311++G(2d,2p)      |
| $^aCs^+-Si_2C_5H_2$ | -790.4463421  | 0.050240 | -790.396102  | 0     | B3LYP-D3BJ/6-311++G(2d,2p) |
| $^aCs^+-Si_2C_5H_2$ | -790.4286590  | 0.050157 | -790.378502  | 0     | TPSSh/6-311++G(2d,2p)      |
| $^aCs^+-Si_2C_5H_2$ | -790.4475886  | 0.050224 | -790.397365  | 0     | TPSSh-D3BJ/6-311++G(2d,2p) |
| $Cs^+-Si_2C_5H_2$   | -790.2043186  | 0.050922 | -790.153397  | 0     | PBE0-D3/def2-TZVP          |
| $Cs^+-Si_2C_5H_2$   | -790.7418662  | 0.050344 | -790.691522  | 0     | TPSSh-D3BJ/def2-TZVP       |

<sup>a</sup> Calculations are done with LANL2DZ ECP for the metal.

**Table S10: Computed energies of  $M^{2+}$ - $\text{Si}_2\text{C}_5\text{H}_2$  at different levels.**

| Species                                                | Energy        | ZPVE     | E+ZPVE       | NImag | Level                      |
|--------------------------------------------------------|---------------|----------|--------------|-------|----------------------------|
|                                                        | a.u           | a.u      | a.u          |       |                            |
| $\text{Be}^{2+}$ - $\text{Si}_2\text{C}_5\text{H}_2$   | -784.7199891  | 0.052803 | -784.667186  | 0     | B3LYP/6-311++G(2d,2p)      |
| $\text{Be}^{2+}$ - $\text{Si}_2\text{C}_5\text{H}_2$   | -784.7496284  | 0.052950 | -784.696679  | 0     | B3LYP-D3BJ/6-311++G(2d,2p) |
| $\text{Be}^{2+}$ - $\text{Si}_2\text{C}_5\text{H}_2$   | -784.7371701  | 0.052892 | -784.684278  | 0     | TPSSh/6-311++G(2d,2p)      |
| $\text{Be}^{2+}$ - $\text{Si}_2\text{C}_5\text{H}_2$   | -784.7565655  | 0.052980 | -784.703585  | 0     | TPSSh-D3BJ/6-311++G(2d,2p) |
| $\text{Be}^{2+}$ - $\text{Si}_2\text{C}_5\text{H}_2$   | -784.2083697  | 0.053634 | -784.154735  | 0     | PBE0-D3/def2-TZVP          |
| $\text{Be}^{2+}$ - $\text{Si}_2\text{C}_5\text{H}_2$   | -784.7740145  | 0.053028 | -784.720987  | 0     | TPSSh-D3BJ/def2-TZVP       |
| $\text{Mg}^{2+}$ - $\text{Si}_2\text{C}_5\text{H}_2$   | -970.1223496  | 0.050751 | -970.071599  | 0     | B3LYP/6-311++G(2d,2p)      |
| $\text{Mg}^{2+}$ - $\text{Si}_2\text{C}_5\text{H}_2$   | -970.1534048  | 0.050879 | -970.102526  | 0     | B3LYP-D3BJ/6-311++G(2d,2p) |
| $\text{Mg}^{2+}$ - $\text{Si}_2\text{C}_5\text{H}_2$   | -970.1356412  | 0.050901 | -970.084740  | 0     | TPSSh/6-311++G(2d,2p)      |
| $\text{Mg}^{2+}$ - $\text{Si}_2\text{C}_5\text{H}_2$   | -970.1559381  | 0.050975 | -970.104964  | 0     | TPSSh-D3BJ/6-311++G(2d,2p) |
| $\text{Mg}^{2+}$ - $\text{Si}_2\text{C}_5\text{H}_2$   | -969.5205459  | 0.051583 | -969.468963  | 0     | PBE0-D3/def2-TZVP          |
| $\text{Mg}^{2+}$ - $\text{Si}_2\text{C}_5\text{H}_2$   | -970.1736987  | 0.051001 | -970.122698  | 0     | TPSSh-D3BJ/def2-TZVP       |
| $\text{Ca}^{2+}$ - $\text{Si}_2\text{C}_5\text{H}_2$   | -1447.7114934 | 0.050586 | -1447.660907 | 0     | B3LYP/6-311++G(2d,2p)      |
| $\text{Ca}^{2+}$ - $\text{Si}_2\text{C}_5\text{H}_2$   | -1447.7432555 | 0.050717 | -1447.692538 | 0     | B3LYP-D3BJ/6-311++G(2d,2p) |
| $\text{Ca}^{2+}$ - $\text{Si}_2\text{C}_5\text{H}_2$   | -1447.7334520 | 0.050659 | -1447.682793 | 0     | TPSSh/6-311++G(2d,2p)      |
| $\text{Ca}^{2+}$ - $\text{Si}_2\text{C}_5\text{H}_2$   | -1447.7540660 | 0.050729 | -1447.703337 | 0     | TPSSh-D3BJ/6-311++G(2d,2p) |
| $\text{Ca}^{2+}$ - $\text{Si}_2\text{C}_5\text{H}_2$   | -1447.0428920 | 0.051392 | -1446.991500 | 0     | PBE0-D3/def2-TZVP          |
| $\text{Ca}^{2+}$ - $\text{Si}_2\text{C}_5\text{H}_2$   | -1447.7734411 | 0.050808 | -1447.722633 | 0     | TPSSh-D3BJ/def2-TZVP       |
| $^a\text{Sr}^{2+}$ - $\text{Si}_2\text{C}_5\text{H}_2$ | -800.5620237  | 0.050370 | -800.511654  | 0     | B3LYP/6-311++G(2d,2p)      |
| $^a\text{Sr}^{2+}$ - $\text{Si}_2\text{C}_5\text{H}_2$ | -800.5932311  | 0.050497 | -800.542734  | 0     | B3LYP-D3BJ/6-311++G(2d,2p) |
| $^a\text{Sr}^{2+}$ - $\text{Si}_2\text{C}_5\text{H}_2$ | -800.5676506  | 0.050470 | -800.517181  | 0     | TPSSh/6-311++G(2d,2p)      |
| $^a\text{Sr}^{2+}$ - $\text{Si}_2\text{C}_5\text{H}_2$ | -800.5879028  | 0.050538 | -800.537365  | 0     | TPSSh-D3BJ/6-311++G(2d,2p) |
| $\text{Sr}^{2+}$ - $\text{Si}_2\text{C}_5\text{H}_2$   | -800.3620785  | 0.051149 | -800.310929  | 0     | PBE0-D3/def2-TZVP          |
| $\text{Sr}^{2+}$ - $\text{Si}_2\text{C}_5\text{H}_2$   | -800.9019560  | 0.050567 | -800.851389  | 0     | TPSSh-D3BJ/def2-TZVP       |
| $^a\text{Ba}^{2+}$ - $\text{Si}_2\text{C}_5\text{H}_2$ | -795.3847069  | 0.050378 | -795.334329  | 0     | B3LYP/6-311++G(2d,2p)      |
| $^a\text{Ba}^{2+}$ - $\text{Si}_2\text{C}_5\text{H}_2$ | -795.4184152  | 0.050586 | -795.367829  | 0     | B3LYP-D3BJ/6-311++G(2d,2p) |
| $^a\text{Ba}^{2+}$ - $\text{Si}_2\text{C}_5\text{H}_2$ | -795.3987371  | 0.050463 | -795.348274  | 0     | TPSSh/6-311++G(2d,2p)      |
| $^a\text{Ba}^{2+}$ - $\text{Si}_2\text{C}_5\text{H}_2$ | -795.4190130  | 0.050494 | -795.368519  | 0     | TPSSh-D3BJ/6-311++G(2d,2p) |
| $\text{Ba}^{2+}$ - $\text{Si}_2\text{C}_5\text{H}_2$   | -795.1702696  | 0.051065 | -795.119205  | 0     | PBE0-D3/def2-TZVP          |
| $\text{Ba}^{2+}$ - $\text{Si}_2\text{C}_5\text{H}_2$   | -795.7169907  | 0.050483 | -795.666507  | 0     | TPSSh-D3BJ/def2-TZVP       |

<sup>a</sup> Calculations are done with LANL2DZ ECP for the metal.

**Table S11: Computed energies of  $[\text{XC}_7\text{H}_2]^{-/2-}$  or  $[\text{XSi}_2\text{C}_5\text{H}_2]^{-/2-}$  at different levels.**

| Species                                                 | Energy       | ZPVE     | E+ZPVE      | NImag | Level              |
|---------------------------------------------------------|--------------|----------|-------------|-------|--------------------|
|                                                         | a.u          | a.u      | a.u         |       |                    |
| $(\text{BeC}_7\text{H}_2)^-$                            | -282.1025784 | 0.052329 | -282.050249 | 2     | UPBE0-D3/def2-TZVP |
| $(\text{MgC}_7\text{H}_2)^-$                            | -467.4221003 | 0.051910 | -467.370190 | 2     | UPBE0-D3/def2-TZVP |
| $(\text{BeSi}_2\text{C}_5\text{H}_2)^-$                 | -784.9067948 | 0.050131 | -784.856664 | 3     | UPBE0-D3/def2-TZVP |
| <sup>a</sup> $(\text{MgSi}_2\text{C}_5\text{H}_2)^-$    |              |          |             |       | UPBE0-D3/def2-TZVP |
| $(\text{BeC}_7\text{H}_2)^{2-}$                         | -281.9626073 | 0.049235 | -281.913372 | 3     | PBE0-D3/def2-TZVP  |
| $(\text{MgC}_7\text{H}_2)^{2-}$                         | -467.2916639 | 0.049054 | -467.242610 | 3     | PBE0-D3/def2-TZVP  |
| $(\text{BeSi}_2\text{C}_5\text{H}_2)^{2-}$              | -784.7973896 | 0.050431 | -784.746958 | 2     | PBE0-D3/def2-TZVP  |
| <sup>a</sup> $(\text{MgSi}_2\text{C}_5\text{H}_2)^{2-}$ |              |          |             |       | PBE0-D3/def2-TZVP  |

<sup>a</sup> Geometry did not converge in planar ppC/ptC form.

**Table S12: Natural charges ( $q$ ,  $|e|$ ) on ppC atoms and Wiberg bond indices (WBI) calculated at the PBE0-D3/def2-TZVP level.**

| system                                           | $q$     | $\text{WBI}_{C-M}$ | $\text{WBI}_{C1-C/Si}$ | $\text{WBI}_{C1-C4}$ |
|--------------------------------------------------|---------|--------------------|------------------------|----------------------|
| $\text{Be}^{2+}\text{-C}_7\text{H}_2$            | -0.4404 | 0.0387             | 1.0257                 | 0.8487               |
| $\text{Mg}^{2+}\text{-C}_7\text{H}_2$            | -0.3129 | 0.0135             | 1.0429                 | 0.8596               |
| $\text{Be}^{2+}\text{-Si}_2\text{C}_5\text{H}_2$ | -1.1092 | 0.1503             | 0.5172                 | 1.0800               |
| $\text{Mg}^{2+}\text{-Si}_2\text{C}_5\text{H}_2$ | -0.8716 | 0.0827             | 0.5327                 | 1.1593               |

**Table S13: Optimized geometries of C<sub>7</sub>H<sub>2</sub> in Cartesian coordinates (in Å) and their total energies (in a.u) obtained at different levels.**

| B3LYP/6-311++G(2d,2p) |           |           |           | B3LYP-D3BJ/6-311++G(2d,2p) |           |           |           |
|-----------------------|-----------|-----------|-----------|----------------------------|-----------|-----------|-----------|
| scf done: -267.698186 |           |           |           | scf done: -267.714368      |           |           |           |
| C                     | 0.000000  | 0.000000  | 0.919880  | C                          | 0.000000  | 0.000000  | 0.919342  |
| C                     | -0.000000 | -1.087393 | -0.065416 | C                          | -0.000000 | -1.089614 | -0.065468 |
| C                     | 0.000000  | 1.087393  | -0.065416 | C                          | 0.000000  | 1.089614  | -0.065468 |
| C                     | 0.000000  | -1.475836 | 1.222288  | C                          | -0.000000 | -1.475015 | 1.222452  |
| C                     | 0.000000  | 1.475836  | 1.222288  | C                          | 0.000000  | 1.475015  | 1.222452  |
| C                     | -0.000000 | -0.685144 | -1.431027 | C                          | -0.000000 | -0.685552 | -1.430866 |
| C                     | 0.000000  | 0.685144  | -1.431027 | C                          | 0.000000  | 0.685552  | -1.430866 |
| H                     | -0.000000 | -1.344755 | -2.285495 | H                          | -0.000000 | -1.344255 | -2.285500 |
| H                     | 0.000000  | 1.344755  | -2.285495 | H                          | 0.000000  | 1.344255  | -2.285500 |
| TPSSh/6-311++G(2d,2p) |           |           |           | TPSSh-D3BJ/6-311++G(2d,2p) |           |           |           |
| scf done: -267.730960 |           |           |           | scf done: -267.741505      |           |           |           |
| C                     | 0.000000  | 0.000000  | 0.922431  | C                          | 0.000000  | 0.000000  | 0.922089  |
| C                     | -0.000000 | -1.085447 | -0.068074 | C                          | 0.000000  | -1.087246 | -0.068417 |
| C                     | 0.000000  | 1.085447  | -0.068074 | C                          | 0.000000  | 1.087246  | -0.068417 |
| C                     | 0.000000  | -1.471759 | 1.229450  | C                          | 0.000000  | -1.471063 | 1.229373  |
| C                     | 0.000000  | 1.471759  | 1.229450  | C                          | 0.000000  | 1.471063  | 1.229373  |
| C                     | -0.000000 | -0.686294 | -1.433993 | C                          | -0.000000 | -0.686638 | -1.433697 |
| C                     | 0.000000  | 0.686294  | -1.433993 | C                          | 0.000000  | 0.686638  | -1.433697 |
| H                     | -0.000000 | -1.348953 | -2.288309 | H                          | -0.000000 | -1.348809 | -2.288015 |
| H                     | 0.000000  | 1.348953  | -2.288309 | H                          | 0.000000  | 1.348809  | -2.288015 |

**Table S14: Optimized geometries of Si<sub>2</sub>C<sub>5</sub>H<sub>2</sub> in Cartesian coordinates (in Å) and their total energies (in a.u) obtained at different levels.**

| B3LYP/6-311++G(2d,2p) |           |           |           | B3LYP-D3BJ/6-311++G(2d,2p) |           |           |           |
|-----------------------|-----------|-----------|-----------|----------------------------|-----------|-----------|-----------|
| scf done: -770.678380 |           |           |           | scf done: -770.702600      |           |           |           |
| C                     | 0.000000  | -0.000000 | 0.333094  | C                          | 0.000000  | -0.000000 | 0.332186  |
| C                     | -0.000000 | -1.156669 | -0.570635 | C                          | -0.000000 | -1.157234 | -0.571660 |
| C                     | 0.000000  | 1.156669  | -0.570635 | C                          | 0.000000  | 1.157234  | -0.571660 |
| Si                    | -0.000000 | -1.785540 | 1.063064  | Si                         | -0.000000 | -1.779004 | 1.063305  |
| Si                    | 0.000000  | 1.785540  | 1.063064  | Si                         | 0.000000  | 1.779004  | 1.063305  |
| C                     | -0.000000 | -0.690661 | -1.909754 | C                          | -0.000000 | -0.690891 | -1.909464 |
| C                     | 0.000000  | 0.690661  | -1.909754 | C                          | 0.000000  | 0.690891  | -1.909464 |
| H                     | -0.000000 | -1.324601 | -2.784163 | H                          | -0.000000 | -1.324923 | -2.783215 |
| H                     | 0.000000  | 1.324601  | -2.784163 | H                          | 0.000000  | 1.324923  | -2.783215 |
| TPSSh/6-311++G(2d,2p) |           |           |           | TPSSh-D3BJ/6-311++G(2d,2p) |           |           |           |
| scf done: -770.688400 |           |           |           | scf done: -770.704221      |           |           |           |
| C                     | 0.000000  | -0.000000 | 0.337228  | C                          | 0.000000  | -0.000000 | 0.336700  |
| C                     | -0.000000 | -1.158939 | -0.573657 | C                          | -0.000000 | -1.159360 | -0.574215 |
| C                     | 0.000000  | 1.158939  | -0.573657 | C                          | 0.000000  | 1.159360  | -0.574215 |
| Si                    | -0.000000 | -1.774399 | 1.068230  | Si                         | -0.000000 | -1.771884 | 1.067908  |
| Si                    | 0.000000  | 1.774399  | 1.068230  | Si                         | 0.000000  | 1.771884  | 1.067908  |
| C                     | -0.000000 | -0.691494 | -1.911643 | C                          | -0.000000 | -0.691664 | -1.911274 |
| C                     | 0.000000  | 0.691494  | -1.911643 | C                          | 0.000000  | 0.691664  | -1.911274 |
| H                     | -0.000000 | -1.327696 | -2.786485 | H                          | -0.000000 | -1.327752 | -2.785709 |
| H                     | 0.000000  | 1.327696  | -2.786485 | H                          | 0.000000  | 1.327752  | -2.785709 |



**Table S15: Optimized geometries of  $\text{Li}^+\text{-C}_7\text{H}_2$  in Cartesian coordinates (in Å) and their total energies (in a.u) obtained at different levels.**

| B3LYP/6-311++G(2d,2p) |          |           |           | B3LYP-D3BJ/6-311++G(2d,2p) |          |           |           |
|-----------------------|----------|-----------|-----------|----------------------------|----------|-----------|-----------|
| scf done: -275.052813 |          |           |           | scf done: -275.072701      |          |           |           |
| C                     | 3.323185 | -0.000000 | 1.000000  | C                          | 3.321530 | -0.000000 | 1.000000  |
| C                     | 3.679643 | 0.000000  | 2.455257  | C                          | 3.680990 | 0.000000  | 2.453412  |
| C                     | 3.679643 | -0.000000 | -0.455257 | C                          | 3.680990 | -0.000000 | -0.453412 |
| C                     | 2.383141 | 0.000000  | 2.109673  | C                          | 2.383665 | 0.000000  | 2.112655  |
| C                     | 2.383141 | -0.000000 | -0.109673 | C                          | 2.383665 | -0.000000 | -0.112655 |
| C                     | 1.016433 | -0.000000 | 1.686614  | C                          | 1.017663 | 0.000000  | 1.686848  |
| C                     | 1.016433 | -0.000000 | 0.313386  | C                          | 1.017663 | -0.000000 | 0.313152  |
| H                     | 0.158713 | 0.000000  | 2.341590  | H                          | 0.159385 | 0.000000  | 2.340532  |
| H                     | 0.158713 | -0.000000 | -0.341590 | H                          | 0.159385 | -0.000000 | -0.340532 |
| Li                    | 5.424652 | 0.000000  | 1.000000  | Li                         | 5.418758 | -0.000000 | 1.000000  |
| TPSSh/6-311++G(2d,2p) |          |           |           | TPSSh-D3BJ/6-311++G(2d,2p) |          |           |           |
| scf done: -275.085939 |          |           |           | scf done: -275.098898      |          |           |           |
| C                     | 3.323347 | -0.000000 | 1.000000  | C                          | 3.322062 | -0.000000 | 1.000000  |
| C                     | 3.685105 | -0.000000 | 2.454264  | C                          | 3.686160 | -0.000000 | 2.452718  |
| C                     | 3.685105 | -0.000000 | -0.454264 | C                          | 3.686160 | -0.000000 | -0.452718 |
| C                     | 2.380696 | 0.000000  | 2.108388  | C                          | 2.380924 | -0.000000 | 2.110732  |
| C                     | 2.380696 | -0.000000 | -0.108388 | C                          | 2.380924 | -0.000000 | -0.110732 |
| C                     | 1.014225 | 0.000000  | 1.687783  | C                          | 1.015112 | 0.000000  | 1.688040  |
| C                     | 1.014225 | -0.000000 | 0.312217  | C                          | 1.015112 | 0.000000  | 0.311960  |
| H                     | 0.156755 | 0.000000  | 2.345512  | H                          | 0.157137 | 0.000000  | 2.344724  |
| H                     | 0.156755 | 0.000000  | -0.345512 | H                          | 0.157137 | 0.000000  | -0.344724 |
| Li                    | 5.426789 | -0.000000 | 1.000000  | Li                         | 5.422970 | -0.000000 | 1.000000  |

**Table S16: Optimized geometries of Na<sup>+</sup>-C<sub>7</sub>H<sub>2</sub> in Cartesian coordinates (in Å) and their total energies (in a.u) obtained at different levels.**

| B3LYP/6-311++G(2d,2p) |          |           |           | B3LYP-D3BJ/6-311++G(2d,2p) |          |           |           |
|-----------------------|----------|-----------|-----------|----------------------------|----------|-----------|-----------|
| scf done: -429.839338 |          |           |           | scf done: -429.859598      |          |           |           |
| C                     | 3.290352 | -0.000000 | 1.000000  | C                          | 3.289041 | -0.000000 | 1.000000  |
| C                     | 3.632234 | -0.000000 | 2.455639  | C                          | 3.633895 | -0.000000 | 2.453509  |
| C                     | 3.632234 | -0.000000 | -0.455639 | C                          | 3.633895 | -0.000000 | -0.453509 |
| C                     | 2.337743 | 0.000000  | 2.103837  | C                          | 2.338461 | 0.000000  | 2.106988  |
| C                     | 2.337743 | 0.000000  | -0.103837 | C                          | 2.338461 | 0.000000  | -0.106988 |
| C                     | 0.970583 | 0.000000  | 1.686052  | C                          | 0.971990 | 0.000000  | 1.686340  |
| C                     | 0.970583 | 0.000000  | 0.313948  | C                          | 0.971990 | 0.000000  | 0.313660  |
| H                     | 0.113644 | 0.000000  | 2.341919  | H                          | 0.114600 | 0.000000  | 2.341105  |
| H                     | 0.113644 | 0.000000  | -0.341919 | H                          | 0.114600 | 0.000000  | -0.341105 |
| Na                    | 5.824936 | -0.000000 | 1.000000  | Na                         | 5.816763 | -0.000000 | 1.000000  |
| TPSSh/6-311++G(2d,2p) |          |           |           | TPSSh-D3BJ/6-311++G(2d,2p) |          |           |           |
| scf done: -429.869098 |          |           |           | scf done: -429.882288      |          |           |           |
| C                     | 3.291344 | -0.000000 | 1.000000  | C                          | 3.291009 | -0.000000 | 1.000000  |
| C                     | 3.637053 | -0.000000 | 2.454827  | C                          | 3.636918 | -0.000000 | 2.454616  |
| C                     | 3.637053 | -0.000000 | -0.454827 | C                          | 3.636918 | -0.000000 | -0.454616 |
| C                     | 2.334797 | 0.000000  | 2.102140  | C                          | 2.334676 | 0.000000  | 2.103703  |
| C                     | 2.334797 | 0.000000  | -0.102140 | C                          | 2.334676 | 0.000000  | -0.103703 |
| C                     | 0.967812 | 0.000000  | 1.687239  | C                          | 0.968251 | 0.000000  | 1.687564  |
| C                     | 0.967812 | 0.000000  | 0.312761  | C                          | 0.968251 | 0.000000  | 0.312436  |
| H                     | 0.111344 | 0.000000  | 2.346241  | H                          | 0.111777 | 0.000000  | 2.346106  |
| H                     | 0.111344 | 0.000000  | -0.346241 | H                          | 0.111777 | 0.000000  | -0.346106 |
| Na                    | 5.830341 | -0.000000 | 1.000000  | Na                         | 5.829445 | -0.000000 | 1.000000  |

**Table S17: Optimized geometries of  $K^+-C_7H_2$  in Cartesian coordinates (in Å) and their total energies (in a.u) obtained at different levels.**

| B3LYP/6-311++G(2d,2p) |          |           |           | B3LYP-D3BJ/6-311++G(2d,2p) |          |           |           |
|-----------------------|----------|-----------|-----------|----------------------------|----------|-----------|-----------|
| scf done: -867.500632 |          |           |           | scf done: -867.521140      |          |           |           |
| C                     | 3.259772 | -0.000000 | 1.000000  | C                          | 3.258521 | -0.000000 | 1.000000  |
| C                     | 3.584792 | 0.000000  | 2.461716  | C                          | 3.587671 | 0.000000  | 2.460153  |
| C                     | 3.584792 | -0.000000 | -0.461716 | C                          | 3.587671 | -0.000000 | -0.460153 |
| C                     | 2.293954 | 0.000000  | 2.098790  | C                          | 2.295873 | 0.000000  | 2.102538  |
| C                     | 2.293954 | 0.000000  | -0.098790 | C                          | 2.295873 | -0.000000 | -0.102538 |
| C                     | 0.927055 | 0.000000  | 1.685628  | C                          | 0.929543 | 0.000000  | 1.685908  |
| C                     | 0.927055 | 0.000000  | 0.314372  | C                          | 0.929543 | 0.000000  | 0.314092  |
| H                     | 0.071576 | 0.000000  | 2.343416  | H                          | 0.073294 | 0.000000  | 2.342101  |
| H                     | 0.071576 | 0.000000  | -0.343416 | H                          | 0.073294 | 0.000000  | -0.342101 |
| K                     | 6.209171 | -0.000000 | 1.000000  | K                          | 6.192413 | -0.000000 | 1.000000  |
| TPSSh/6-311++G(2d,2p) |          |           |           | TPSSh-D3BJ/6-311++G(2d,2p) |          |           |           |
| scf done: -867.536034 |          |           |           | scf done: -867.549429      |          |           |           |
| C                     | 3.262701 | -0.000000 | 1.000000  | C                          | 3.261299 | -0.000000 | 1.000000  |
| C                     | 3.591481 | 0.000000  | 2.459809  | C                          | 3.593246 | 0.000000  | 2.459217  |
| C                     | 3.591481 | -0.000000 | -0.459809 | C                          | 3.593246 | -0.000000 | -0.459217 |
| C                     | 2.292448 | 0.000000  | 2.097049  | C                          | 2.293564 | 0.000000  | 2.099882  |
| C                     | 2.292448 | -0.000000 | -0.097049 | C                          | 2.293564 | -0.000000 | -0.099882 |
| C                     | 0.926082 | 0.000000  | 1.686904  | C                          | 0.927412 | 0.000000  | 1.687067  |
| C                     | 0.926082 | -0.000000 | 0.313096  | C                          | 0.927412 | 0.000000  | 0.312933  |
| H                     | 0.070945 | 0.000000  | 2.347556  | H                          | 0.071755 | 0.000000  | 2.346705  |
| H                     | 0.070945 | -0.000000 | -0.347556 | H                          | 0.071755 | 0.000000  | -0.346705 |
| K                     | 6.199084 | -0.000000 | 1.000000  | K                          | 6.190444 | -0.000000 | 1.000000  |

**Table S18: Optimized geometries of  $\text{Rb}^+-\text{C}_7\text{H}_2$  in Cartesian coordinates (in Å) and their total energies (in a.u) obtained at different levels.**

| B3LYP/6-311++G(2d,2p) |          |           |           | B3LYP-D3BJ/6-311++G(2d,2p) |          |           |           |
|-----------------------|----------|-----------|-----------|----------------------------|----------|-----------|-----------|
| scf done: -291.438707 |          |           |           | scf done: -291.459054      |          |           |           |
| C                     | 3.232931 | 0.000000  | 1.000000  | C                          | 3.232268 | 0.000000  | 1.000000  |
| C                     | 3.552393 | 0.000000  | 2.463005  | C                          | 3.555941 | 0.000000  | 2.461386  |
| C                     | 3.552393 | -0.000000 | -0.463005 | C                          | 3.555941 | -0.000000 | -0.461386 |
| C                     | 2.262323 | 0.000000  | 2.096358  | C                          | 2.264921 | 0.000000  | 2.100094  |
| C                     | 2.262323 | 0.000000  | -0.096358 | C                          | 2.264921 | 0.000000  | -0.100094 |
| C                     | 0.895351 | 0.000000  | 1.685483  | C                          | 0.898520 | 0.000000  | 1.685721  |
| C                     | 0.895351 | 0.000000  | 0.314517  | C                          | 0.898520 | 0.000000  | 0.314279  |
| H                     | 0.040171 | 0.000000  | 2.343651  | H                          | 0.042616 | 0.000000  | 2.342353  |
| H                     | 0.040171 | 0.000000  | -0.343651 | H                          | 0.042616 | 0.000000  | -0.342353 |
| Rb                    | 6.490291 | -0.000000 | 1.000000  | Rb                         | 6.467431 | -0.000000 | 1.000000  |
| TPSSh/6-311++G(2d,2p) |          |           |           | TPSSh-D3BJ/6-311++G(2d,2p) |          |           |           |
| scf done: -291.463923 |          |           |           | scf done: -291.477226      |          |           |           |
| C                     | 3.236388 | 0.000000  | 1.000000  | C                          | 3.235222 | 0.000000  | 1.000000  |
| C                     | 3.559546 | 0.000000  | 2.460974  | C                          | 3.561565 | 0.000000  | 2.460042  |
| C                     | 3.559546 | -0.000000 | -0.460974 | C                          | 3.561565 | -0.000000 | -0.460042 |
| C                     | 2.261116 | 0.000000  | 2.094553  | C                          | 2.262451 | 0.000000  | 2.097398  |
| C                     | 2.261116 | 0.000000  | -0.094553 | C                          | 2.262451 | 0.000000  | -0.097398 |
| C                     | 0.894574 | 0.000000  | 1.686740  | C                          | 0.896256 | 0.000000  | 1.686893  |
| C                     | 0.894574 | 0.000000  | 0.313260  | C                          | 0.896256 | 0.000000  | 0.313107  |
| H                     | 0.039792 | 0.000000  | 2.347931  | H                          | 0.040955 | 0.000000  | 2.347021  |
| H                     | 0.039792 | 0.000000  | -0.347931 | H                          | 0.040955 | 0.000000  | -0.347021 |
| Rb                    | 6.477253 | -0.000000 | 1.000000  | Rb                         | 6.466018 | -0.000000 | 1.000000  |

**Table S19: Optimized geometries of Cs<sup>+</sup>-C<sub>7</sub>H<sub>2</sub> in Cartesian coordinates (in Å) and their total energies (in a.u) obtained at different levels.**

| B3LYP/6-311++G(2d,2p) |          |           |           | B3LYP-D3BJ/6-311++G(2d,2p) |          |           |           |
|-----------------------|----------|-----------|-----------|----------------------------|----------|-----------|-----------|
| scf done: -287.460662 |          |           |           | scf done: -287.480912      |          |           |           |
| C                     | 3.211018 | 0.000000  | 1.000000  | C                          | 3.210757 | 0.000000  | 1.000000  |
| C                     | 3.525558 | 0.000000  | 2.465296  | C                          | 3.529854 | 0.000000  | 2.463490  |
| C                     | 3.525558 | -0.000000 | -0.465296 | C                          | 3.529854 | -0.000000 | -0.463490 |
| C                     | 2.236642 | 0.000000  | 2.094602  | C                          | 2.239774 | 0.000000  | 2.098628  |
| C                     | 2.236642 | 0.000000  | -0.094602 | C                          | 2.239774 | 0.000000  | -0.098628 |
| C                     | 0.869707 | 0.000000  | 1.685335  | C                          | 0.873423 | 0.000000  | 1.685610  |
| C                     | 0.869707 | 0.000000  | 0.314665  | C                          | 0.873423 | 0.000000  | 0.314390  |
| H                     | 0.014989 | 0.000000  | 2.344071  | H                          | 0.017831 | 0.000000  | 2.342648  |
| H                     | 0.014989 | 0.000000  | -0.344071 | H                          | 0.017831 | 0.000000  | -0.342648 |
| Cs                    | 6.718886 | -0.000000 | 1.000000  | Cs                         | 6.691176 | -0.000000 | 1.000000  |
| TPSSh/6-311++G(2d,2p) |          |           |           | TPSSh-D3BJ/6-311++G(2d,2p) |          |           |           |
| scf done: -287.493417 |          |           |           | scf done: -287.506676      |          |           |           |
| C                     | 3.215373 | 0.000000  | 1.000000  | C                          | 3.214242 | 0.000000  | 1.000000  |
| C                     | 3.533824 | 0.000000  | 2.462817  | C                          | 3.536230 | 0.000000  | 2.461754  |
| C                     | 3.533824 | -0.000000 | -0.462817 | C                          | 3.536230 | -0.000000 | -0.461754 |
| C                     | 2.236317 | 0.000000  | 2.092843  | C                          | 2.237862 | 0.000000  | 2.095916  |
| C                     | 2.236317 | 0.000000  | -0.092843 | C                          | 2.237862 | 0.000000  | -0.095916 |
| C                     | 0.869806 | 0.000000  | 1.686587  | C                          | 0.871697 | 0.000000  | 1.686782  |
| C                     | 0.869806 | 0.000000  | 0.313413  | C                          | 0.871697 | 0.000000  | 0.313218  |
| H                     | 0.015542 | 0.000000  | 2.348425  | H                          | 0.016726 | 0.000000  | 2.347355  |
| H                     | 0.015542 | 0.000000  | -0.348425 | H                          | 0.016726 | 0.000000  | -0.347355 |
| Cs                    | 6.697346 | -0.000000 | 1.000000  | Cs                         | 6.684423 | -0.000000 | 1.000000  |

**Table S20: Optimized geometries of  $\text{Be}^{2+}\text{-C}_7\text{H}_2$  in Cartesian coordinates (in Å) and their total energies (in a.u) obtained at different levels.**

| B3LYP/6-311++G(2d,2p) |          |           |           | B3LYP-D3BJ/6-311++G(2d,2p) |          |           |           |
|-----------------------|----------|-----------|-----------|----------------------------|----------|-----------|-----------|
| scf done: -281.712165 |          |           |           | scf done: -281.732956      |          |           |           |
| C                     | 3.284832 | -0.000000 | 1.000000  | C                          | 3.284481 | -0.000000 | 1.000000  |
| C                     | 3.774937 | -0.000000 | 2.384892  | C                          | 3.774452 | -0.000000 | 2.384559  |
| C                     | 3.774937 | -0.000000 | -0.384892 | C                          | 3.774452 | -0.000000 | -0.384559 |
| C                     | 2.440263 | 0.000000  | 2.161750  | C                          | 2.440165 | 0.000000  | 2.162450  |
| C                     | 2.440263 | -0.000000 | -0.161750 | C                          | 2.440165 | -0.000000 | -0.162450 |
| C                     | 1.071866 | 0.000000  | 1.696408  | C                          | 1.072583 | 0.000000  | 1.696429  |
| C                     | 1.071866 | 0.000000  | 0.303592  | C                          | 1.072583 | 0.000000  | 0.303571  |
| H                     | 0.200637 | 0.000000  | 2.340550  | H                          | 0.201606 | 0.000000  | 2.340235  |
| H                     | 0.200637 | 0.000000  | -0.340550 | H                          | 0.201606 | 0.000000  | -0.340235 |
| Be                    | 4.963459 | -0.000000 | 1.000000  | Be                         | 4.961606 | -0.000000 | 1.000000  |
| TPSSh/6-311++G(2d,2p) |          |           |           | TPSSh-D3BJ/6-311++G(2d,2p) |          |           |           |
| scf done: -281.753207 |          |           |           | scf done: -281.766752      |          |           |           |
| C                     | 3.281071 | -0.000000 | 1.000000  | C                          | 3.280724 | -0.000000 | 1.000000  |
| C                     | 3.780557 | -0.000000 | 2.386466  | C                          | 3.780293 | -0.000000 | 2.386415  |
| C                     | 3.780557 | -0.000000 | -0.386466 | C                          | 3.780293 | -0.000000 | -0.386415 |
| C                     | 2.438857 | -0.000000 | 2.161668  | C                          | 2.438943 | -0.000000 | 2.162213  |
| C                     | 2.438857 | 0.000000  | -0.161668 | C                          | 2.438943 | 0.000000  | -0.162213 |
| C                     | 1.070406 | 0.000000  | 1.697757  | C                          | 1.070817 | 0.000000  | 1.697785  |
| C                     | 1.070406 | 0.000000  | 0.302243  | C                          | 1.070817 | 0.000000  | 0.302215  |
| H                     | 0.198822 | 0.000000  | 2.343609  | H                          | 0.199352 | 0.000000  | 2.343324  |
| H                     | 0.198822 | 0.000000  | -0.343609 | H                          | 0.199352 | 0.000000  | -0.343324 |
| Be                    | 4.965343 | -0.000000 | 1.000000  | Be                         | 4.964161 | -0.000000 | 1.000000  |

**Table S21: Optimized geometries of  $\text{Mg}^{2+}\text{-C}_7\text{H}_2$  in Cartesian coordinates (in Å) and their total energies (in a.u) obtained at different levels.**

| B3LYP/6-311++G(2d,2p) |          |           |           | B3LYP-D3BJ/6-311++G(2d,2p) |          |           |           |
|-----------------------|----------|-----------|-----------|----------------------------|----------|-----------|-----------|
| scf done: -467.154832 |          |           |           | scf done: -467.176714      |          |           |           |
| C                     | 3.275919 | -0.000000 | 1.000000  | C                          | 3.275039 | -0.000000 | 1.000000  |
| C                     | 3.701796 | 0.000000  | 2.397331  | C                          | 3.701839 | -0.000000 | 2.396746  |
| C                     | 3.701796 | -0.000000 | -0.397331 | C                          | 3.701839 | -0.000000 | -0.396746 |
| C                     | 2.381488 | 0.000000  | 2.137705  | C                          | 2.381837 | 0.000000  | 2.139334  |
| C                     | 2.381488 | -0.000000 | -0.137705 | C                          | 2.381837 | 0.000000  | -0.139334 |
| C                     | 1.012310 | 0.000000  | 1.691607  | C                          | 1.013388 | 0.000000  | 1.691649  |
| C                     | 1.012310 | 0.000000  | 0.308393  | C                          | 1.013388 | 0.000000  | 0.308351  |
| H                     | 0.147072 | 0.000000  | 2.340791  | H                          | 0.148033 | 0.000000  | 2.340259  |
| H                     | 0.147072 | 0.000000  | -0.340791 | H                          | 0.148033 | 0.000000  | -0.340259 |
| Mg                    | 5.462444 | -0.000000 | 1.000000  | Mg                         | 5.458464 | -0.000000 | 1.000000  |
| TPSSh/6-311++G(2d,2p) |          |           |           | TPSSh-D3BJ/6-311++G(2d,2p) |          |           |           |
| scf done: -467.190712 |          |           |           | scf done: -467.204945      |          |           |           |
| C                     | 3.276051 | -0.000000 | 1.000000  | C                          | 3.275726 | -0.000000 | 1.000000  |
| C                     | 3.706220 | -0.000000 | 2.403349  | C                          | 3.705993 | -0.000000 | 2.403317  |
| C                     | 3.706220 | -0.000000 | -0.403349 | C                          | 3.705993 | -0.000000 | -0.403317 |
| C                     | 2.380885 | 0.000000  | 2.136161  | C                          | 2.380876 | 0.000000  | 2.137004  |
| C                     | 2.380885 | 0.000000  | -0.136161 | C                          | 2.380876 | 0.000000  | -0.137004 |
| C                     | 1.011693 | 0.000000  | 1.692710  | C                          | 1.012111 | 0.000000  | 1.692842  |
| C                     | 1.011693 | 0.000000  | 0.307290  | C                          | 1.012111 | 0.000000  | 0.307158  |
| H                     | 0.146391 | 0.000000  | 2.344195  | H                          | 0.146986 | 0.000000  | 2.344128  |
| H                     | 0.146391 | 0.000000  | -0.344195 | H                          | 0.146986 | 0.000000  | -0.344128 |
| Mg                    | 5.457264 | -0.000000 | 1.000000  | Mg                         | 5.456038 | -0.000000 | 1.000000  |

**Table S22: Optimized geometries of  $\text{Ca}^{2+}\text{-C}_7\text{H}_2$  in Cartesian coordinates (in Å) and their total energies (in a.u) obtained at different levels.**

| B3LYP/6-311++G(2d,2p) |          |           |           | B3LYP-D3BJ/6-311++G(2d,2p) |          |           |           |
|-----------------------|----------|-----------|-----------|----------------------------|----------|-----------|-----------|
| scf done: -944.764773 |          |           |           | scf done: -944.787071      |          |           |           |
| C                     | 3.289990 | -0.000000 | 1.000000  | C                          | 3.288706 | -0.000000 | 1.000000  |
| C                     | 3.649334 | 0.000000  | 2.440782  | C                          | 3.649777 | 0.000000  | 2.439716  |
| C                     | 3.649334 | -0.000000 | -0.440782 | C                          | 3.649777 | -0.000000 | -0.439716 |
| C                     | 2.348919 | 0.000000  | 2.122440  | C                          | 2.349094 | 0.000000  | 2.125191  |
| C                     | 2.348919 | -0.000000 | -0.122440 | C                          | 2.349094 | -0.000000 | -0.125191 |
| C                     | 0.983414 | -0.000000 | 1.689018  | C                          | 0.984385 | 0.000000  | 1.689257  |
| C                     | 0.983414 | -0.000000 | 0.310982  | C                          | 0.984385 | 0.000000  | 0.310743  |
| H                     | 0.122902 | 0.000000  | 2.343639  | H                          | 0.124209 | 0.000000  | 2.343654  |
| H                     | 0.122902 | -0.000000 | -0.343639 | H                          | 0.124209 | 0.000000  | -0.343654 |
| Ca                    | 5.724568 | 0.000000  | 1.000000  | Ca                         | 5.720062 | -0.000000 | 1.000000  |
| TPSSh/6-311++G(2d,2p) |          |           |           | TPSSh-D3BJ/6-311++G(2d,2p) |          |           |           |
| scf done: -944.807603 |          |           |           | scf done: -944.822084      |          |           |           |
| C                     | 3.291063 | -0.000000 | 1.000000  | C                          | 3.290734 | -0.000000 | 1.000000  |
| C                     | 3.656368 | 0.000000  | 2.440753  | C                          | 3.656235 | 0.000000  | 2.440925  |
| C                     | 3.656368 | -0.000000 | -0.440753 | C                          | 3.656235 | -0.000000 | -0.440925 |
| C                     | 2.348853 | 0.000000  | 2.121047  | C                          | 2.348970 | 0.000000  | 2.122620  |
| C                     | 2.348853 | -0.000000 | -0.121047 | C                          | 2.348970 | -0.000000 | -0.122620 |
| C                     | 0.983205 | 0.000000  | 1.690289  | C                          | 0.983811 | 0.000000  | 1.690559  |
| C                     | 0.983205 | 0.000000  | 0.309711  | C                          | 0.983811 | 0.000000  | 0.309441  |
| H                     | 0.123821 | 0.000000  | 2.348644  | H                          | 0.124350 | 0.000000  | 2.348340  |
| H                     | 0.123821 | -0.000000 | -0.348644 | H                          | 0.124350 | 0.000000  | -0.348340 |
| Ca                    | 5.708137 | -0.000000 | 1.000000  | Ca                         | 5.706229 | -0.000000 | 1.000000  |



**Table S23: Optimized geometries of Sr<sup>2+</sup>-C<sub>7</sub>H<sub>2</sub> in Cartesian coordinates (in Å) and their total energies (in a.u) obtained at different levels.**

| B3LYP/6-311++G(2d,2p) |          |           |           | B3LYP-D3BJ/6-311++G(2d,2p) |          |           |           |
|-----------------------|----------|-----------|-----------|----------------------------|----------|-----------|-----------|
| scf done: -297.628275 |          |           |           | scf done: -297.650273      |          |           |           |
| C                     | 3.257052 | 0.000000  | 1.000000  | C                          | 3.256297 | 0.000000  | 1.000000  |
| C                     | 3.614102 | 0.000000  | 2.434739  | C                          | 3.614952 | 0.000000  | 2.433792  |
| C                     | 3.614102 | -0.000000 | -0.434739 | C                          | 3.614952 | -0.000000 | -0.433792 |
| C                     | 2.312985 | 0.000000  | 2.115061  | C                          | 2.313664 | 0.000000  | 2.117768  |
| C                     | 2.312985 | 0.000000  | -0.115061 | C                          | 2.313664 | 0.000000  | -0.117768 |
| C                     | 0.945265 | 0.000000  | 1.687730  | C                          | 0.946782 | 0.000000  | 1.688043  |
| C                     | 0.945265 | 0.000000  | 0.312270  | C                          | 0.946782 | 0.000000  | 0.311957  |
| H                     | 0.086313 | 0.000000  | 2.343168  | H                          | 0.087563 | 0.000000  | 2.342469  |
| H                     | 0.086313 | 0.000000  | -0.343168 | H                          | 0.087563 | 0.000000  | -0.342469 |
| Sr                    | 6.049314 | -0.000000 | 1.000000  | Sr                         | 6.041476 | -0.000000 | 1.000000  |
| TPSSh/6-311++G(2d,2p) |          |           |           | TPSSh-D3BJ/6-311++G(2d,2p) |          |           |           |
| scf done: -297.654090 |          |           |           | scf done: -297.668380      |          |           |           |
| C                     | 3.259121 | 0.000000  | 1.000000  | C                          | 3.258828 | 0.000000  | 1.000000  |
| C                     | 3.620879 | 0.000000  | 2.435713  | C                          | 3.621053 | 0.000000  | 2.435804  |
| C                     | 3.620879 | -0.000000 | -0.435713 | C                          | 3.621053 | -0.000000 | -0.435804 |
| C                     | 2.312963 | 0.000000  | 2.113636  | C                          | 2.313360 | 0.000000  | 2.115417  |
| C                     | 2.312963 | -0.000000 | -0.113636 | C                          | 2.313360 | -0.000000 | -0.115417 |
| C                     | 0.945503 | 0.000000  | 1.689086  | C                          | 0.946320 | 0.000000  | 1.689250  |
| C                     | 0.945503 | 0.000000  | 0.310914  | C                          | 0.946320 | 0.000000  | 0.310750  |
| H                     | 0.086928 | 0.000000  | 2.347274  | H                          | 0.087553 | 0.000000  | 2.346746  |
| H                     | 0.086928 | 0.000000  | -0.347274 | H                          | 0.087553 | 0.000000  | -0.346746 |
| Sr                    | 6.032030 | -0.000000 | 1.000000  | Sr                         | 6.028296 | -0.000000 | 1.000000  |

**Table S24: Optimized geometries of Ba<sup>2+</sup>-C<sub>7</sub>H<sub>2</sub> in Cartesian coordinates (in Å) and their total energies (in a.u) obtained at different levels.**

| B3LYP/6-311++G(2d,2p) |          |           |           | B3LYP-D3BJ/6-311++G(2d,2p) |          |           |           |
|-----------------------|----------|-----------|-----------|----------------------------|----------|-----------|-----------|
| scf done: -292.452352 |          |           |           | scf done: -292.474487      |          |           |           |
| C                     | 3.246176 | 0.000000  | 1.000000  | C                          | 3.244995 | 0.000000  | 1.000000  |
| C                     | 3.587193 | 0.000000  | 2.444226  | C                          | 3.588425 | 0.000000  | 2.442933  |
| C                     | 3.587193 | -0.000000 | -0.444226 | C                          | 3.588425 | -0.000000 | -0.442933 |
| C                     | 2.290871 | 0.000000  | 2.110033  | C                          | 2.291634 | 0.000000  | 2.112969  |
| C                     | 2.290871 | 0.000000  | -0.110033 | C                          | 2.291634 | 0.000000  | -0.112969 |
| C                     | 0.923531 | 0.000000  | 1.687038  | C                          | 0.925052 | 0.000000  | 1.687408  |
| C                     | 0.923531 | 0.000000  | 0.312962  | C                          | 0.925052 | 0.000000  | 0.312592  |
| H                     | 0.065829 | 0.000000  | 2.343631  | H                          | 0.067286 | 0.000000  | 2.343258  |
| H                     | 0.065829 | 0.000000  | -0.343631 | H                          | 0.067286 | 0.000000  | -0.343258 |
| Ba                    | 6.242674 | -0.000000 | 1.000000  | Ba                         | 6.233909 | -0.000000 | 1.000000  |
| TPSSh/6-311++G(2d,2p) |          |           |           | TPSSh-D3BJ/6-311++G(2d,2p) |          |           |           |
| scf done: -292.486596 |          |           |           | scf done: -292.500971      |          |           |           |
| C                     | 3.249486 | 0.000000  | 1.000000  | C                          | 3.248627 | 0.000000  | 1.000000  |
| C                     | 3.595067 | 0.000000  | 2.444338  | C                          | 3.595622 | 0.000000  | 2.443918  |
| C                     | 3.595067 | -0.000000 | -0.444338 | C                          | 3.595622 | -0.000000 | -0.443918 |
| C                     | 2.291696 | 0.000000  | 2.108388  | C                          | 2.292030 | 0.000000  | 2.110574  |
| C                     | 2.291696 | 0.000000  | -0.108388 | C                          | 2.292030 | 0.000000  | -0.110574 |
| C                     | 0.924488 | 0.000000  | 1.688374  | C                          | 0.925277 | 0.000000  | 1.688623  |
| C                     | 0.924488 | 0.000000  | 0.311626  | C                          | 0.925277 | 0.000000  | 0.311377  |
| H                     | 0.067441 | 0.000000  | 2.348126  | H                          | 0.068030 | 0.000000  | 2.347676  |
| H                     | 0.067441 | 0.000000  | -0.348126 | H                          | 0.068030 | 0.000000  | -0.347676 |
| Ba                    | 6.216827 | -0.000000 | 1.000000  | Ba                         | 6.213152 | -0.000000 | 1.000000  |

**Table S25: Optimized geometries of  $\text{Li}^+\text{-Si}_2\text{C}_5\text{H}_2$  in Cartesian coordinates (in Å) and their total energies (in a.u) obtained at different levels.**

| B3LYP/6-311++G(2d,2p) |          |           |           | B3LYP-D3BJ/6-311++G(2d,2p) |          |           |           |
|-----------------------|----------|-----------|-----------|----------------------------|----------|-----------|-----------|
| scf done: -778.008941 |          |           |           | scf done: -778.038036      |          |           |           |
| C                     | 3.225131 | -0.000000 | 1.000000  | C                          | 3.223466 | -0.000000 | 1.000000  |
| Si                    | 3.785200 | 0.000000  | 2.948383  | Si                         | 3.787378 | 0.000000  | 2.940408  |
| Si                    | 3.785200 | -0.000000 | -0.948383 | Si                         | 3.787378 | -0.000000 | -0.940408 |
| C                     | 2.264923 | 0.000000  | 2.130268  | C                          | 2.264225 | 0.000000  | 2.131981  |
| C                     | 2.264923 | -0.000000 | -0.130268 | C                          | 2.264225 | -0.000000 | -0.131981 |
| C                     | 0.923677 | -0.000000 | 1.687775  | C                          | 0.924147 | -0.000000 | 1.688072  |
| C                     | 0.923677 | -0.000000 | 0.312225  | C                          | 0.924147 | -0.000000 | 0.311928  |
| H                     | 0.060854 | 0.000000  | 2.334790  | H                          | 0.061649 | 0.000000  | 2.334804  |
| H                     | 0.060854 | -0.000000 | -0.334790 | H                          | 0.061649 | -0.000000 | -0.334804 |
| Li                    | 5.461544 | 0.000000  | 1.000000  | Li                         | 5.457722 | 0.000000  | 1.000000  |
| TPSSh/6-311++G(2d,2p) |          |           |           | TPSSh-D3BJ/6-311++G(2d,2p) |          |           |           |
| scf done: -778.020489 |          |           |           | scf done: -778.039454      |          |           |           |
| C                     | 3.223356 | -0.000000 | 1.000000  | C                          | 3.222640 | -0.000000 | 1.000000  |
| Si                    | 3.795519 | 0.000000  | 2.922400  | Si                         | 3.795689 | 0.000000  | 2.920157  |
| Si                    | 3.795519 | -0.000000 | -0.922400 | Si                         | 3.795689 | -0.000000 | -0.920157 |
| C                     | 2.257218 | 0.000000  | 2.131310  | C                          | 2.257038 | 0.000000  | 2.132472  |
| C                     | 2.257218 | -0.000000 | -0.131310 | C                          | 2.257038 | -0.000000 | -0.132472 |
| C                     | 0.916534 | -0.000000 | 1.688968  | C                          | 0.916951 | -0.000000 | 1.689170  |
| C                     | 0.916534 | -0.000000 | 0.311032  | C                          | 0.916951 | -0.000000 | 0.310830  |
| H                     | 0.053973 | 0.000000  | 2.338789  | H                          | 0.054740 | 0.000000  | 2.338882  |
| H                     | 0.053973 | -0.000000 | -0.338789 | H                          | 0.054740 | -0.000000 | -0.338882 |
| Li                    | 5.486142 | 0.000000  | 1.000000  | Li                         | 5.484510 | 0.000000  | 1.000000  |

**Table S26: Optimized geometries of Na<sup>+</sup>-Si<sub>2</sub>C<sub>5</sub>H<sub>2</sub> in Cartesian coordinates (in Å) and their total energies (in a.u) obtained at different levels.**

| B3LYP/6-311++G(2d,2p) |          |           |           | B3LYP-D3BJ/6-311++G(2d,2p) |          |           |           |
|-----------------------|----------|-----------|-----------|----------------------------|----------|-----------|-----------|
| scf done: -932.791811 |          |           |           | scf done: -932.821403      |          |           |           |
| C                     | 3.232611 | -0.000000 | 1.000000  | C                          | 3.232362 | -0.000000 | 1.000000  |
| Si                    | 3.852793 | -0.000000 | 2.882265  | Si                         | 3.854908 | -0.000000 | 2.875221  |
| Si                    | 3.852793 | -0.000000 | -0.882265 | Si                         | 3.854908 | -0.000000 | -0.875221 |
| C                     | 2.293818 | 0.000000  | 2.137763  | C                          | 2.294362 | 0.000000  | 2.138949  |
| C                     | 2.293818 | 0.000000  | -0.137763 | C                          | 2.294362 | 0.000000  | -0.138949 |
| C                     | 0.951737 | 0.000000  | 1.688468  | C                          | 0.953367 | 0.000000  | 1.688726  |
| C                     | 0.951737 | 0.000000  | 0.311532  | C                          | 0.953367 | 0.000000  | 0.311274  |
| H                     | 0.085379 | 0.000000  | 2.331003  | H                          | 0.087483 | 0.000000  | 2.331158  |
| H                     | 0.085379 | 0.000000  | -0.331003 | H                          | 0.087483 | 0.000000  | -0.331158 |
| Na                    | 6.155922 | -0.000000 | 1.000000  | Na                         | 6.143384 | -0.000000 | 1.000000  |
| TPSSh/6-311++G(2d,2p) |          |           |           | TPSSh-D3BJ/6-311++G(2d,2p) |          |           |           |
| scf done: -932.800545 |          |           |           | scf done: -932.819766      |          |           |           |
| C                     | 3.229358 | -0.000000 | 1.000000  | C                          | 3.229563 | -0.000000 | 1.000000  |
| Si                    | 3.860919 | -0.000000 | 2.858062  | Si                         | 3.861213 | -0.000000 | 2.855978  |
| Si                    | 3.860919 | -0.000000 | -0.858062 | Si                         | 3.861213 | -0.000000 | -0.855978 |
| C                     | 2.285377 | 0.000000  | 2.140156  | C                          | 2.285696 | 0.000000  | 2.140936  |
| C                     | 2.285377 | 0.000000  | -0.140156 | C                          | 2.285696 | 0.000000  | -0.140936 |
| C                     | 0.944509 | 0.000000  | 1.689774  | C                          | 0.945392 | 0.000000  | 1.689890  |
| C                     | 0.944509 | 0.000000  | 0.310226  | C                          | 0.945392 | 0.000000  | 0.310110  |
| H                     | 0.077653 | 0.000000  | 2.334195  | H                          | 0.079039 | 0.000000  | 2.334468  |
| H                     | 0.077653 | 0.000000  | -0.334195 | H                          | 0.079039 | 0.000000  | -0.334468 |
| Na                    | 6.189711 | -0.000000 | 1.000000  | Na                         | 6.183742 | -0.000000 | 1.000000  |

**Table S27: Optimized geometries of  $K^+-Si_2C_5H_2$  in Cartesian coordinates (in Å) and their total energies (in a.u) obtained at different levels.**

| B3LYP/6-311++G(2d,2p)  |          |           |           | B3LYP-D3BJ/6-311++G(2d,2p) |          |           |           |
|------------------------|----------|-----------|-----------|----------------------------|----------|-----------|-----------|
| scf done: -1370.453989 |          |           |           | scf done: -1370.483714     |          |           |           |
| C                      | 3.154172 | -0.000000 | 1.000000  | C                          | 3.159094 | -0.000000 | 1.000000  |
| Si                     | 3.810299 | 0.000000  | 2.840511  | Si                         | 3.814680 | 0.000000  | 2.836856  |
| Si                     | 3.810299 | -0.000000 | -0.840511 | Si                         | 3.814680 | -0.000000 | -0.836856 |
| C                      | 2.225053 | 0.000000  | 2.143915  | C                          | 2.229813 | 0.000000  | 2.144614  |
| C                      | 2.225053 | 0.000000  | -0.143915 | C                          | 2.229813 | 0.000000  | -0.144614 |
| C                      | 0.884148 | 0.000000  | 1.689147  | C                          | 0.889923 | 0.000000  | 1.689305  |
| C                      | 0.884148 | 0.000000  | 0.310853  | C                          | 0.889923 | 0.000000  | 0.310695  |
| H                      | 0.015416 | 0.000000  | 2.328777  | H                          | 0.021734 | 0.000000  | 2.328941  |
| H                      | 0.015416 | 0.000000  | -0.328777 | H                          | 0.021734 | 0.000000  | -0.328941 |
| K                      | 6.731984 | -0.000000 | 1.000000  | K                          | 6.684592 | -0.000000 | 1.000000  |
| TPSSh/6-311++G(2d,2p)  |          |           |           | TPSSh-D3BJ/6-311++G(2d,2p) |          |           |           |
| scf done: -1370.468339 |          |           |           | scf done: -1370.487691     |          |           |           |
| C                      | 3.158817 | -0.000000 | 1.000000  | C                          | 3.161946 | 0.000000  | 1.000000  |
| Si                     | 3.819071 | 0.000000  | 2.825460  | Si                         | 3.820854 | 0.000000  | 2.825013  |
| Si                     | 3.819071 | -0.000000 | -0.825460 | Si                         | 3.820854 | -0.000000 | -0.825013 |
| C                      | 2.222978 | 0.000000  | 2.145738  | C                          | 2.225703 | 0.000000  | 2.146176  |
| C                      | 2.222978 | -0.000000 | -0.145738 | C                          | 2.225703 | 0.000000  | -0.146176 |
| C                      | 0.883191 | 0.000000  | 1.690220  | C                          | 0.886406 | 0.000000  | 1.690302  |
| C                      | 0.883191 | 0.000000  | 0.309780  | C                          | 0.886406 | 0.000000  | 0.309698  |
| H                      | 0.014237 | 0.000000  | 2.332077  | H                          | 0.017943 | 0.000000  | 2.332352  |
| H                      | 0.014237 | 0.000000  | -0.332077 | H                          | 0.017943 | 0.000000  | -0.332352 |
| K                      | 6.718214 | -0.000000 | 1.000000  | K                          | 6.692229 | -0.000000 | 1.000000  |

**Table S28: Optimized geometries of  $\text{Rb}^+\text{-Si}_2\text{C}_5\text{H}_2$  in Cartesian coordinates (in Å) and their total energies (in a.u) obtained at different levels.**

| B3LYP/6-311++G(2d,2p) |           |           |           | B3LYP-D3BJ/6-311++G(2d,2p) |           |           |           |
|-----------------------|-----------|-----------|-----------|----------------------------|-----------|-----------|-----------|
| scf done: -794.393817 |           |           |           | scf done: -794.423048      |           |           |           |
| C                     | 2.843190  | 0.000000  | 1.000000  | C                          | 2.849841  | 0.000000  | 1.000000  |
| Si                    | 3.520752  | 0.000000  | 2.819040  | Si                         | 3.527136  | 0.000000  | 2.815001  |
| Si                    | 3.520752  | -0.000000 | -0.819040 | Si                         | 3.527136  | -0.000000 | -0.815001 |
| C                     | 1.921384  | 0.000000  | 2.147538  | C                          | 1.928057  | 0.000000  | 2.148169  |
| C                     | 1.921384  | 0.000000  | -0.147538 | C                          | 1.928057  | 0.000000  | -0.148169 |
| C                     | 0.580847  | 0.000000  | 1.689523  | C                          | 0.588529  | 0.000000  | 1.689677  |
| C                     | 0.580847  | 0.000000  | 0.310477  | C                          | 0.588529  | 0.000000  | 0.310323  |
| H                     | -0.289456 | 0.000000  | 2.327274  | H                          | -0.281228 | 0.000000  | 2.327396  |
| H                     | -0.289456 | 0.000000  | -0.327274 | H                          | -0.281228 | 0.000000  | -0.327396 |
| Rb                    | 6.917681  | -0.000000 | 1.000000  | Rb                         | 6.853096  | -0.000000 | 1.000000  |
| TPSSh/6-311++G(2d,2p) |           |           |           | TPSSh-D3BJ/6-311++G(2d,2p) |           |           |           |
| scf done: -794.397737 |           |           |           | scf done: -794.416808      |           |           |           |
| C                     | 2.850655  | 0.000000  | 1.000000  | C                          | 2.853442  | 0.000000  | 1.000000  |
| Si                    | 3.530571  | 0.000000  | 2.805905  | Si                         | 3.533232  | 0.000000  | 2.804521  |
| Si                    | 3.530571  | -0.000000 | -0.805905 | Si                         | 3.533232  | -0.000000 | -0.804521 |
| C                     | 1.921708  | 0.000000  | 2.149437  | C                          | 1.924678  | 0.000000  | 2.150015  |
| C                     | 1.921708  | 0.000000  | -0.149437 | C                          | 1.924678  | 0.000000  | -0.150015 |
| C                     | 0.582426  | 0.000000  | 1.690550  | C                          | 0.585896  | 0.000000  | 1.690667  |
| C                     | 0.582426  | 0.000000  | 0.309450  | C                          | 0.585896  | 0.000000  | 0.309333  |
| H                     | -0.288077 | 0.000000  | 2.330559  | H                          | -0.284351 | 0.000000  | 2.330574  |
| H                     | -0.288077 | 0.000000  | -0.330559 | H                          | -0.284351 | 0.000000  | -0.330574 |
| Rb                    | 6.884016  | -0.000000 | 1.000000  | Rb                         | 6.855573  | -0.000000 | 1.000000  |

**Table S29: Optimized geometries of Cs<sup>+</sup>-Si<sub>2</sub>C<sub>5</sub>H<sub>2</sub> in Cartesian coordinates (in Å) and their total energies (in a.u) obtained at different levels.**

| B3LYP/6-311++G(2d,2p) |           |           |           | B3LYP-D3BJ/6-311++G(2d,2p) |           |           |           |
|-----------------------|-----------|-----------|-----------|----------------------------|-----------|-----------|-----------|
| scf done: -790.417400 |           |           |           | scf done: -790.446342      |           |           |           |
| C                     | 2.807408  | 0.000000  | 1.000000  | C                          | 2.815158  | 0.000000  | 1.000000  |
| Si                    | 3.491181  | 0.000000  | 2.813310  | Si                         | 3.499823  | 0.000000  | 2.808899  |
| Si                    | 3.491181  | -0.000000 | -0.813310 | Si                         | 3.499823  | -0.000000 | -0.808899 |
| C                     | 1.887243  | 0.000000  | 2.148799  | C                          | 1.895744  | 0.000000  | 2.149574  |
| C                     | 1.887243  | 0.000000  | -0.148799 | C                          | 1.895744  | 0.000000  | -0.149574 |
| C                     | 0.547028  | 0.000000  | 1.689615  | C                          | 0.556403  | 0.000000  | 1.689783  |
| C                     | 0.547028  | 0.000000  | 0.310385  | C                          | 0.556403  | 0.000000  | 0.310217  |
| H                     | -0.323735 | 0.000000  | 2.326874  | H                          | -0.313972 | 0.000000  | 2.326848  |
| H                     | -0.323735 | 0.000000  | -0.326874 | H                          | -0.313972 | 0.000000  | -0.326848 |
| Cs                    | 7.217084  | -0.000000 | 1.000000  | Cs                         | 7.136772  | -0.000000 | 1.000000  |
| TPSSh/6-311++G(2d,2p) |           |           |           | TPSSh-D3BJ/6-311++G(2d,2p) |           |           |           |
| scf done: -790.428659 |           |           |           | scf done: -790.447589      |           |           |           |
| C                     | 2.818233  | 0.000000  | 1.000000  | C                          | 2.821962  | 0.000000  | 1.000000  |
| Si                    | 3.503340  | 0.000000  | 2.801178  | Si                         | 3.507397  | 0.000000  | 2.798989  |
| Si                    | 3.503340  | -0.000000 | -0.801178 | Si                         | 3.507397  | -0.000000 | -0.798989 |
| C                     | 1.890731  | 0.000000  | 2.150583  | C                          | 1.894773  | 0.000000  | 2.151329  |
| C                     | 1.890731  | 0.000000  | -0.150583 | C                          | 1.894773  | 0.000000  | -0.151329 |
| C                     | 0.551733  | 0.000000  | 1.690615  | C                          | 0.556359  | 0.000000  | 1.690749  |
| C                     | 0.551733  | 0.000000  | 0.309385  | C                          | 0.556359  | 0.000000  | 0.309251  |
| H                     | -0.319220 | 0.000000  | 2.330150  | H                          | -0.314291 | 0.000000  | 2.330207  |
| H                     | -0.319220 | 0.000000  | -0.330150 | H                          | -0.314291 | 0.000000  | -0.330207 |
| Cs                    | 7.156524  | -0.000000 | 1.000000  | Cs                         | 7.117489  | -0.000000 | 1.000000  |

**Table S30: Optimized geometries of Be<sup>2+</sup>-Si<sub>2</sub>C<sub>5</sub>H<sub>2</sub> in Cartesian coordinates (in Å) and their total energies (in a.u) obtained at different levels.**

| B3LYP/6-311++G(2d,2p) |          |           |           | B3LYP-D3BJ/6-311++G(2d,2p) |          |           |           |
|-----------------------|----------|-----------|-----------|----------------------------|----------|-----------|-----------|
| scf done: -784.719989 |          |           |           | scf done: -784.749628      |          |           |           |
| C                     | 3.379638 | -0.000000 | 1.000000  | C                          | 3.377945 | -0.000000 | 1.000000  |
| Si                    | 3.939672 | 0.000000  | 3.003370  | Si                         | 3.941053 | 0.000000  | 2.995762  |
| Si                    | 3.939672 | -0.000000 | -1.003370 | Si                         | 3.941053 | -0.000000 | -0.995762 |
| C                     | 2.420260 | 0.000000  | 2.134192  | C                          | 2.419455 | 0.000000  | 2.135647  |
| C                     | 2.420260 | -0.000000 | -0.134192 | C                          | 2.419455 | -0.000000 | -0.135647 |
| C                     | 1.089754 | 0.000000  | 1.697224  | C                          | 1.090025 | 0.000000  | 1.697549  |
| C                     | 1.089754 | -0.000000 | 0.302776  | C                          | 1.090025 | -0.000000 | 0.302451  |
| H                     | 0.221984 | 0.000000  | 2.340580  | H                          | 0.222737 | 0.000000  | 2.340813  |
| H                     | 0.221984 | -0.000000 | -0.340580 | H                          | 0.222737 | -0.000000 | -0.340813 |
| Be                    | 5.033008 | -0.000000 | 1.000000  | Be                         | 5.031502 | -0.000000 | 1.000000  |
| TPSSh/6-311++G(2d,2p) |          |           |           | TPSSh-D3BJ/6-311++G(2d,2p) |          |           |           |
| scf done: -784.737170 |          |           |           | scf done: -784.756565      |          |           |           |
| C                     | 3.375844 | -0.000000 | 1.000000  | C                          | 3.373937 | -0.000000 | 1.000000  |
| Si                    | 3.952940 | 0.000000  | 2.977329  | Si                         | 3.953268 | 0.000000  | 2.974157  |
| Si                    | 3.952940 | -0.000000 | -0.977329 | Si                         | 3.953268 | -0.000000 | -0.974157 |
| C                     | 2.415897 | 0.000000  | 2.133683  | C                          | 2.415796 | 0.000000  | 2.135706  |
| C                     | 2.415897 | -0.000000 | -0.133683 | C                          | 2.415796 | -0.000000 | -0.135706 |
| C                     | 1.082611 | 0.000000  | 1.698049  | C                          | 1.083695 | 0.000000  | 1.698289  |
| C                     | 1.082611 | -0.000000 | 0.301951  | C                          | 1.083695 | -0.000000 | 0.301711  |
| H                     | 0.216242 | 0.000000  | 2.345794  | H                          | 0.216435 | 0.000000  | 2.344064  |
| H                     | 0.216242 | -0.000000 | -0.345794 | H                          | 0.216435 | -0.000000 | -0.344064 |
| Be                    | 5.044765 | -0.000000 | 1.000000  | Be                         | 5.043660 | -0.000000 | 1.000000  |



**Table S31: Optimized geometries of  $\text{Mg}^{2+}\text{-Si}_2\text{C}_5\text{H}_2$  in Cartesian coordinates (in Å) and their total energies (in a.u) obtained at different levels.**

| B3LYP/6-311++G(2d,2p) |          |           |           | B3LYP-D3BJ/6-311++G(2d,2p) |          |           |           |
|-----------------------|----------|-----------|-----------|----------------------------|----------|-----------|-----------|
| scf done: -970.122350 |          |           |           | scf done: -970.153405      |          |           |           |
| C                     | 3.347459 | -0.000000 | 1.000000  | C                          | 3.345594 | -0.000000 | 1.000000  |
| Si                    | 3.835803 | -0.000000 | 3.087603  | Si                         | 3.839514 | -0.000000 | 3.076347  |
| Si                    | 3.835803 | -0.000000 | -1.087603 | Si                         | 3.839514 | -0.000000 | -1.076347 |
| C                     | 2.395168 | 0.000000  | 2.124913  | C                          | 2.393564 | 0.000000  | 2.126554  |
| C                     | 2.395168 | 0.000000  | -0.124913 | C                          | 2.393564 | 0.000000  | -0.126554 |
| C                     | 1.049861 | 0.000000  | 1.689097  | C                          | 1.049452 | 0.000000  | 1.689572  |
| C                     | 1.049861 | 0.000000  | 0.310903  | C                          | 1.049452 | 0.000000  | 0.310428  |
| H                     | 0.187782 | 0.000000  | 2.338332  | H                          | 0.187468 | 0.000000  | 2.338236  |
| H                     | 0.187782 | 0.000000  | -0.338332 | H                          | 0.187468 | 0.000000  | -0.338236 |
| Mg                    | 5.514358 | -0.000000 | 1.000000  | Mg                         | 5.513455 | -0.000000 | 1.000000  |
| TPSSh/6-311++G(2d,2p) |          |           |           | TPSSh-D3BJ/6-311++G(2d,2p) |          |           |           |
| scf done: -970.135641 |          |           |           | scf done: -970.155938      |          |           |           |
| C                     | 3.347073 | -0.000000 | 1.000000  | C                          | 3.344816 | -0.000000 | 1.000000  |
| Si                    | 3.857958 | -0.000000 | 3.032638  | Si                         | 3.859712 | -0.000000 | 3.028877  |
| Si                    | 3.857958 | -0.000000 | -1.032638 | Si                         | 3.859712 | -0.000000 | -1.028877 |
| C                     | 2.382010 | 0.000000  | 2.123904  | C                          | 2.381865 | 0.000000  | 2.125669  |
| C                     | 2.382010 | 0.000000  | -0.123904 | C                          | 2.381865 | 0.000000  | -0.125669 |
| C                     | 1.038111 | 0.000000  | 1.690995  | C                          | 1.038226 | 0.000000  | 1.691148  |
| C                     | 1.038111 | 0.000000  | 0.309005  | C                          | 1.038226 | 0.000000  | 0.308852  |
| H                     | 0.176686 | 0.000000  | 2.343530  | H                          | 0.176681 | 0.000000  | 2.343052  |
| H                     | 0.176686 | 0.000000  | -0.343530 | H                          | 0.176681 | 0.000000  | -0.343052 |
| Mg                    | 5.542443 | -0.000000 | 1.000000  | Mg                         | 5.541262 | -0.000000 | 1.000000  |

**Table S32: Optimized geometries of  $\text{Ca}^{2+}\text{-Si}_2\text{C}_5\text{H}_2$  in Cartesian coordinates (in Å) and their total energies (in a.u) obtained at different levels.**

| B3LYP/6-311++G(2d,2p)  |          |           |           | B3LYP-D3BJ/6-311++G(2d,2p) |          |           |           |
|------------------------|----------|-----------|-----------|----------------------------|----------|-----------|-----------|
| scf done: -1447.711493 |          |           |           | scf done: -1447.743255     |          |           |           |
| C                      | 3.317730 | -0.000000 | 1.000000  | C                          | 3.315942 | -0.000000 | 1.000000  |
| Si                     | 3.813754 | 0.000000  | 2.988236  | Si                         | 3.816036 | 0.000000  | 2.980823  |
| Si                     | 3.813754 | -0.000000 | -0.988236 | Si                         | 3.816036 | -0.000000 | -0.980823 |
| C                      | 2.327029 | 0.000000  | 2.123475  | C                          | 2.326409 | 0.000000  | 2.125720  |
| C                      | 2.327029 | 0.000000  | -0.123475 | C                          | 2.326409 | 0.000000  | -0.125720 |
| C                      | 0.987991 | 0.000000  | 1.689254  | C                          | 0.988426 | 0.000000  | 1.689625  |
| C                      | 0.987991 | 0.000000  | 0.310746  | C                          | 0.988426 | 0.000000  | 0.310375  |
| H                      | 0.126475 | 0.000000  | 2.339081  | H                          | 0.127217 | 0.000000  | 2.339246  |
| H                      | 0.126475 | 0.000000  | -0.339081 | H                          | 0.127217 | 0.000000  | -0.339246 |
| Ca                     | 5.927757 | -0.000000 | 1.000000  | Ca                         | 5.923869 | -0.000000 | 1.000000  |
| TPSSh/6-311++G(2d,2p)  |          |           |           | TPSSh-D3BJ/6-311++G(2d,2p) |          |           |           |
| scf done: -1447.733452 |          |           |           | scf done: -1447.754066     |          |           |           |
| C                      | 3.320738 | -0.000000 | 1.000000  | C                          | 3.319400 | -0.000000 | 1.000000  |
| Si                     | 3.826895 | -0.000000 | 2.960285  | Si                         | 3.827678 | 0.000000  | 2.958445  |
| Si                     | 3.826895 | -0.000000 | -0.960285 | Si                         | 3.827678 | -0.000000 | -0.958445 |
| C                      | 2.320953 | 0.000000  | 2.123089  | C                          | 2.321061 | 0.000000  | 2.124941  |
| C                      | 2.320953 | 0.000000  | -0.123089 | C                          | 2.321061 | 0.000000  | -0.124941 |
| C                      | 0.981995 | 0.000000  | 1.690599  | C                          | 0.982593 | 0.000000  | 1.690835  |
| C                      | 0.981995 | 0.000000  | 0.309401  | C                          | 0.982593 | 0.000000  | 0.309165  |
| H                      | 0.121614 | 0.000000  | 2.344398  | H                          | 0.122235 | 0.000000  | 2.344151  |
| H                      | 0.121614 | 0.000000  | -0.344398 | H                          | 0.122235 | 0.000000  | -0.344151 |
| Ca                     | 5.932336 | -0.000000 | 1.000000  | Ca                         | 5.929450 | -0.000000 | 1.000000  |

**Table S33: Optimized geometries of Sr<sup>2+</sup>-Si<sub>2</sub>C<sub>5</sub>H<sub>2</sub> in Cartesian coordinates (in Å) and their total energies (in a.u) obtained at different levels.**

| B3LYP/6-311++G(2d,2p) |           |           |           | B3LYP-D3BJ/6-311++G(2d,2p) |           |           |           |
|-----------------------|-----------|-----------|-----------|----------------------------|-----------|-----------|-----------|
| scf done: -800.562024 |           |           |           | scf done: -800.593231      |           |           |           |
| C                     | 3.220355  | 0.000000  | 1.000000  | C                          | 3.220152  | 0.000000  | 1.000000  |
| Si                    | 3.760249  | 0.000000  | 2.941881  | Si                         | 3.761989  | 0.000000  | 2.936518  |
| Si                    | 3.760249  | -0.000000 | -0.941881 | Si                         | 3.761989  | -0.000000 | -0.936518 |
| C                     | 2.250953  | 0.000000  | 2.124899  | C                          | 2.251651  | 0.000000  | 2.126581  |
| C                     | 2.250953  | 0.000000  | -0.124899 | C                          | 2.251651  | 0.000000  | -0.126581 |
| C                     | 0.907580  | 0.000000  | 1.687939  | C                          | 0.909277  | 0.000000  | 1.688243  |
| C                     | 0.907580  | 0.000000  | 0.312061  | C                          | 0.909277  | 0.000000  | 0.311757  |
| H                     | 0.045352  | 0.000000  | 2.336320  | H                          | 0.047406  | 0.000000  | 2.336272  |
| H                     | 0.045352  | 0.000000  | -0.336320 | H                          | 0.047406  | 0.000000  | -0.336272 |
| Sr                    | 6.329187  | -0.000000 | 1.000000  | Sr                         | 6.317013  | -0.000000 | 1.000000  |
| TPSSh/6-311++G(2d,2p) |           |           |           | TPSSh-D3BJ/6-311++G(2d,2p) |           |           |           |
| scf done: -800.567651 |           |           |           | scf done: -800.587903      |           |           |           |
| C                     | 2.998177  | 0.000000  | 1.000000  | C                          | 2.997957  | 0.000000  | 1.000000  |
| Si                    | 3.548088  | 0.000000  | 2.915029  | Si                         | 3.548761  | 0.000000  | 2.913415  |
| Si                    | 3.548088  | -0.000000 | -0.915029 | Si                         | 3.548761  | -0.000000 | -0.913415 |
| C                     | 2.020210  | 0.000000  | 2.126081  | C                          | 2.020737  | 0.000000  | 2.127407  |
| C                     | 2.020210  | 0.000000  | -0.126081 | C                          | 2.020737  | 0.000000  | -0.127407 |
| C                     | 0.678062  | 0.000000  | 1.689438  | C                          | 0.679026  | 0.000000  | 1.689611  |
| C                     | 0.678062  | 0.000000  | 0.310562  | C                          | 0.679026  | 0.000000  | 0.310389  |
| H                     | -0.183900 | 0.000000  | 2.340563  | H                          | -0.182659 | 0.000000  | 2.340613  |
| H                     | -0.183900 | 0.000000  | -0.340563 | H                          | -0.182659 | 0.000000  | -0.340613 |
| Sr                    | 6.104828  | -0.000000 | 1.000000  | Sr                         | 6.098239  | -0.000000 | 1.000000  |

**Table S34: Optimized geometries of Ba<sup>2+</sup>-Si<sub>2</sub>C<sub>5</sub>H<sub>2</sub> in Cartesian coordinates (in Å) and their total energies (in a.u) obtained at different levels.**

| B3LYP/6-311++G(2d,2p) |           |           |           | B3LYP-D3BJ/6-311++G(2d,2p) |           |           |           |
|-----------------------|-----------|-----------|-----------|----------------------------|-----------|-----------|-----------|
| scf done: -795.384707 |           |           |           | scf done: -795.418415      |           |           |           |
| C                     | 3.175415  | 0.000000  | 1.000000  | C                          | 3.119910  | 0.000000  | 1.000000  |
| Si                    | 3.745223  | 0.000000  | 2.905458  | Si                         | 3.734151  | 0.000000  | 2.864339  |
| Si                    | 3.745223  | -0.000000 | -0.905458 | Si                         | 3.734151  | -0.000000 | -0.864339 |
| C                     | 2.212929  | 0.000000  | 2.129626  | C                          | 2.176687  | 0.000000  | 2.136639  |
| C                     | 2.212929  | 0.000000  | -0.129626 | C                          | 2.176687  | 0.000000  | -0.136639 |
| C                     | 0.870960  | 0.000000  | 1.688323  | C                          | 0.834980  | 0.000000  | 1.689244  |
| C                     | 0.870960  | 0.000000  | 0.311677  | C                          | 0.834980  | 0.000000  | 0.310756  |
| H                     | 0.006880  | 0.000000  | 2.334212  | H                          | -0.030968 | 0.000000  | 2.331813  |
| H                     | 0.006880  | 0.000000  | -0.334212 | H                          | -0.030968 | 0.000000  | -0.331813 |
| Ba                    | 6.630412  | -0.000000 | 1.000000  | Ba                         | 6.928201  | -0.000000 | 1.000000  |
| TPSSh/6-311++G(2d,2p) |           |           |           | TPSSh-D3BJ/6-311++G(2d,2p) |           |           |           |
| scf done: -795.398737 |           |           |           | scf done: -795.419013      |           |           |           |
| C                     | 2.956965  | -0.000000 | 1.000000  | C                          | 2.956602  | 0.000000  | 1.000000  |
| Si                    | 3.532191  | 0.000000  | 2.886116  | Si                         | 3.531722  | 0.000000  | 2.885567  |
| Si                    | 3.532191  | -0.000000 | -0.886116 | Si                         | 3.531722  | -0.000000 | -0.885567 |
| C                     | 1.986169  | 0.000000  | 2.130784  | C                          | 1.986190  | 0.000000  | 2.131615  |
| C                     | 1.986169  | -0.000000 | -0.130784 | C                          | 1.986190  | -0.000000 | -0.131615 |
| C                     | 0.644745  | -0.000000 | 1.689500  | C                          | 0.645206  | 0.000000  | 1.689674  |
| C                     | 0.644745  | -0.000000 | 0.310500  | C                          | 0.645206  | 0.000000  | 0.310326  |
| H                     | -0.218623 | -0.000000 | 2.338729  | H                          | -0.217810 | 0.000000  | 2.338858  |
| H                     | -0.218623 | -0.000000 | -0.338729 | H                          | -0.217810 | 0.000000  | -0.338858 |
| Ba                    | 6.381999  | -0.000000 | 1.000000  | Ba                         | 6.380708  | -0.000000 | 1.000000  |

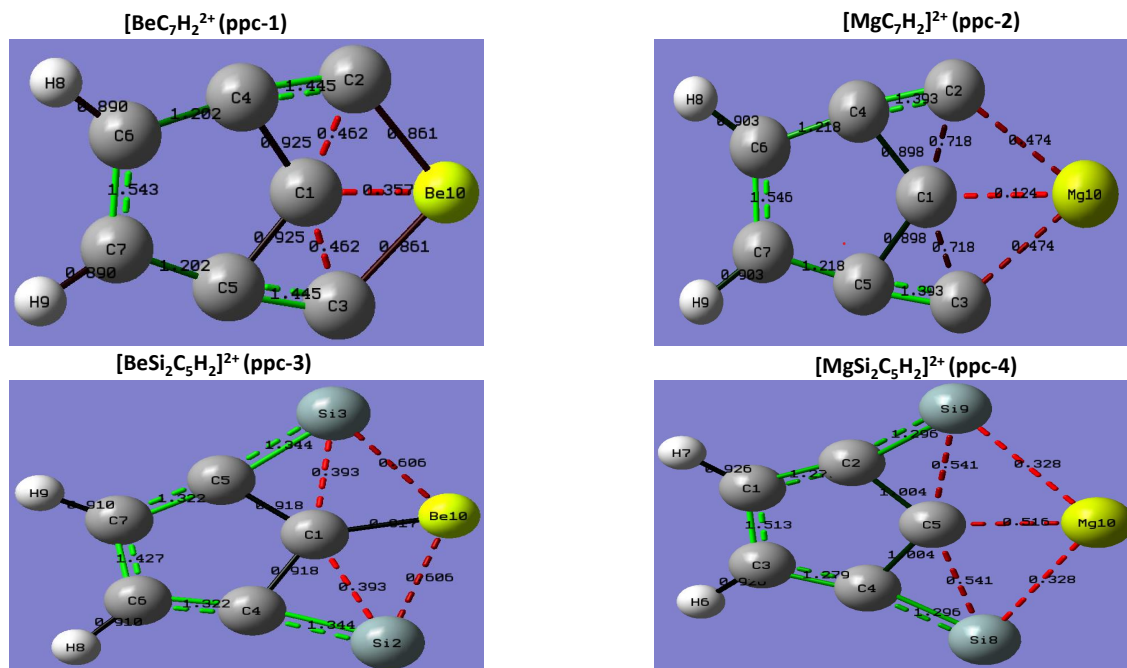

Figure S11: Mayer bonding analysis of  $[\text{BeC}_7\text{H}_2]^{2+}$ (ppC-1),  $[\text{MgC}_7\text{H}_2]^{2+}$ (ppC-2),  $[\text{BeSi}_2\text{C}_5\text{H}_2]^{2+}$ (ppC-3), and  $[\text{MgSi}_2\text{C}_5\text{H}_2]^{2+}$ (ppC-4) obtained at PBE0-D3/def2-TZVP level of theory.

Mayer bonding analysis of  $[\text{BeC}_7\text{H}_2]^{2+}$ (ppC-1) obtained at PBE0-D3/def2-TZVP level of theory.

\*\*\*\*\* Bond order matrix \*\*\*\*\*

|   | 1          | 2          | 3          | 4          | 5          |
|---|------------|------------|------------|------------|------------|
| 1 | 3.16688594 | 0.46204262 | 0.46204262 | 0.92463322 | 0.92463322 |
| 2 | 0.46204262 | 3.00540197 | 0.07688240 | 1.44488333 | 0.08353146 |
| 3 | 0.46204262 | 0.07688240 | 3.00540197 | 0.08353146 | 1.44488333 |
| 4 | 0.92463322 | 1.44488333 | 0.08353146 | 3.89080095 | 0.11247450 |
| 5 | 0.92463322 | 0.08353146 | 1.44488333 | 0.11247450 | 3.89080095 |
| 6 | 0.01069814 | 0.00249285 | 0.06788831 | 1.20246225 | 0.07556516 |
| 7 | 0.01069814 | 0.06788831 | 0.00249285 | 0.07556516 | 1.20246225 |
| 8 | 0.00755248 | 0.00170940 | 0.00544960 | 0.00608027 | 0.00689007 |
| 9 | 0.00755248 | 0.00544960 | 0.00170940 | 0.00689007 | 0.00608027 |

|    |            |            |            |            |            |
|----|------------|------------|------------|------------|------------|
| 10 | 0.35703303 | 0.86052199 | 0.86052199 | 0.03428070 | 0.03428070 |
|    | 6          | 7          | 8          | 9          | 10         |
| 1  | 0.01069814 | 0.01069814 | 0.00755248 | 0.00755248 | 0.35703303 |
| 2  | 0.00249285 | 0.06788831 | 0.00170940 | 0.00544960 | 0.86052199 |
| 3  | 0.06788831 | 0.00249285 | 0.00544960 | 0.00170940 | 0.86052199 |
| 4  | 1.20246225 | 0.07556516 | 0.00608027 | 0.00689007 | 0.03428070 |
| 5  | 0.07556516 | 1.20246225 | 0.00689007 | 0.00608027 | 0.03428070 |
| 6  | 3.82957828 | 1.54330107 | 0.89044970 | 0.00635882 | 0.03036197 |
| 7  | 1.54330107 | 3.82957828 | 0.00635882 | 0.89044970 | 0.03036197 |
| 8  | 0.89044970 | 0.00635882 | 0.92695717 | 0.00008321 | 0.00238362 |
| 9  | 0.00635882 | 0.89044970 | 0.00008321 | 0.92695717 | 0.00238362 |
| 10 | 0.03036197 | 0.03036197 | 0.00238362 | 0.00238362 | 2.21212959 |

Mayer bonding analysis of  $[\text{MgC}_7\text{H}_2]^{2+}$  (ppC-2) obtained at PBE0-D3/def2-TZVP level of theory.

\*\*\*\*\* Bond order matrix \*\*\*\*\*

|   | 1          | 2           | 3           | 4          | 5          |
|---|------------|-------------|-------------|------------|------------|
| 1 | 3.38050804 | 0.71820452  | 0.71820452  | 0.89834732 | 0.89834732 |
| 2 | 0.71820452 | 2.78924586  | -0.00969728 | 1.39293559 | 0.13975659 |
| 3 | 0.71820452 | -0.00969728 | 2.78924586  | 0.13975659 | 1.39293559 |
| 4 | 0.89834732 | 1.39293559  | 0.13975659  | 3.89966332 | 0.13318124 |
| 5 | 0.89834732 | 0.13975659  | 1.39293559  | 0.13318124 | 3.89966332 |
| 6 | 0.00260321 | -0.00896838 | 0.07793997  | 1.21745082 | 0.07157265 |
| 7 | 0.00260321 | 0.07793997  | -0.00896838 | 0.07157265 | 1.21745082 |
| 8 | 0.00920584 | 0.00028619  | 0.00453476  | 0.00227781 | 0.00667231 |
| 9 | 0.00920584 | 0.00453476  | 0.00028619  | 0.00667231 | 0.00227781 |

|    |             |             |            |            |            |
|----|-------------|-------------|------------|------------|------------|
| 10 | 0.12378626  | 0.47425391  | 0.47425391 | 0.03746898 | 0.03746898 |
|    | 6           | 7           | 8          | 9          | 10         |
| 1  | 0.00260321  | 0.00260321  | 0.00920584 | 0.00920584 | 0.12378626 |
| 2  | -0.00896838 | 0.07793997  | 0.00028619 | 0.00453476 | 0.47425391 |
| 3  | 0.07793997  | -0.00896838 | 0.00453476 | 0.00028619 | 0.47425391 |
| 4  | 1.21745082  | 0.07157265  | 0.00227781 | 0.00667231 | 0.03746898 |
| 5  | 0.07157265  | 1.21745082  | 0.00667231 | 0.00227781 | 0.03746898 |
| 6  | 3.82956663  | 1.54631783  | 0.90286758 | 0.00723846 | 0.01254449 |
| 7  | 1.54631783  | 3.82956663  | 0.00723846 | 0.90286758 | 0.01254449 |
| 8  | 0.90286758  | 0.00723846  | 0.93412216 | 0.00012824 | 0.00091097 |
| 9  | 0.00723846  | 0.90286758  | 0.00012824 | 0.93412216 | 0.00091097 |
| 10 | 0.01254449  | 0.01254449  | 0.00091097 | 0.00091097 | 1.17414297 |

Mayer bonding analysis of  $[\text{BeSi}_2\text{C}_5\text{H}_2]^{2+}$  (ppC-3) obtained at PBE0-D3/def2-TZVP level of theory.

\*\*\*\*\* Bond order matrix \*\*\*\*\*

|    | 1          | 2          | 3          | 4          | 5          |
|----|------------|------------|------------|------------|------------|
| 1  | 3.57173052 | 0.39339784 | 0.39339784 | 0.91851268 | 0.91851268 |
| 2  | 0.39339784 | 2.64409973 | 0.04202707 | 1.34429970 | 0.13344378 |
| 3  | 0.39339784 | 0.04202707 | 2.64409973 | 0.13344378 | 1.34429970 |
| 4  | 0.91851268 | 1.34429970 | 0.13344378 | 3.96445348 | 0.08115450 |
| 5  | 0.91851268 | 0.13344378 | 1.34429970 | 0.08115450 | 3.96445348 |
| 6  | 0.00777873 | 0.03939484 | 0.07903784 | 1.32175459 | 0.04108361 |
| 7  | 0.00777873 | 0.07903784 | 0.03939484 | 0.04108361 | 1.32175459 |
| 8  | 0.00771722 | 0.00089789 | 0.00557681 | 0.00638836 | 0.00676996 |
| 9  | 0.00771722 | 0.00557681 | 0.00089789 | 0.00676996 | 0.00638836 |
| 10 | 0.91691758 | 0.60602395 | 0.60602395 | 0.11104629 | 0.11104629 |
|    | 6          | 7          | 8          | 9          | 10         |
| 1  | 0.00777873 | 0.00777873 | 0.00771722 | 0.00771722 | 0.91691758 |
| 2  | 0.03939484 | 0.07903784 | 0.00089789 | 0.00557681 | 0.60602395 |
| 3  | 0.07903784 | 0.03939484 | 0.00557681 | 0.00089789 | 0.60602395 |
| 4  | 1.32175459 | 0.04108361 | 0.00638836 | 0.00676996 | 0.11104629 |
| 5  | 0.04108361 | 1.32175459 | 0.00676996 | 0.00638836 | 0.11104629 |
| 6  | 3.88503957 | 1.42723205 | 0.91024830 | 0.00609071 | 0.05241889 |
| 7  | 1.42723205 | 3.88503957 | 0.00609071 | 0.91024830 | 0.05241889 |
| 8  | 0.91024830 | 0.00609071 | 0.94575212 | 0.00028175 | 0.00178113 |
| 9  | 0.00609071 | 0.91024830 | 0.00028175 | 0.94575212 | 0.00178113 |
| 10 | 0.05241889 | 0.05241889 | 0.00178113 | 0.00178113 | 2.45945810 |



Mayer bonding analysis of  $[\text{MgSi}_2\text{C}_5\text{H}_2]^{2+}$  (ppC-4) obtained at PBE0-D3/def2-TZVP level of theory.

\*\*\*\*\* Bond order matrix \*\*\*\*\*

|    | 1           | 2           | 3          | 4           | 5          |
|----|-------------|-------------|------------|-------------|------------|
| 1  | 3.91250604  | 1.27882094  | 1.51329477 | 0.02840045  | 0.00594909 |
| 2  | 1.27882094  | 3.93135480  | 0.02840065 | 0.09830460  | 1.00449672 |
| 3  | 1.51329477  | 0.02840065  | 3.91250622 | 1.27882143  | 0.00594928 |
| 4  | 0.02840045  | 0.09830460  | 1.27882143 | 3.93136320  | 1.00449711 |
| 5  | 0.00594909  | 1.00449672  | 0.00594928 | 1.00449711  | 3.63528611 |
| 6  | 0.00337266  | 0.00741677  | 0.92624777 | -0.00063351 | 0.00806198 |
| 7  | 0.92624777  | -0.00063349 | 0.00337262 | 0.00741678  | 0.00806196 |
| 8  | 0.08589365  | 0.13613148  | 0.03779789 | 1.29576216  | 0.54129686 |
| 9  | 0.03779787  | 1.29575530  | 0.08589318 | 0.13613091  | 0.54130048 |
| 10 | 0.03272883  | 0.08266184  | 0.03272863 | 0.08266328  | 0.51567261 |
|    | 6           | 7           | 8          | 9           | 10         |
| 1  | 0.00337266  | 0.92624777  | 0.08589365 | 0.03779787  | 0.03272883 |
| 2  | 0.00741677  | -0.00063349 | 0.13613148 | 1.29575530  | 0.08266184 |
| 3  | 0.92624777  | 0.00337262  | 0.03779789 | 0.08589318  | 0.03272863 |
| 4  | -0.00063351 | 0.00741678  | 1.29576216 | 0.13613091  | 0.08266328 |
| 5  | 0.00806198  | 0.00806196  | 0.54129686 | 0.54130048  | 0.51567261 |
| 6  | 0.95066652  | -0.00008414 | 0.00048021 | 0.00516038  | 0.00064440 |
| 7  | -0.00008414 | 0.95066650  | 0.00516037 | 0.00048021  | 0.00064441 |
| 8  | 0.00048021  | 0.00516037  | 2.46776875 | 0.03694669  | 0.32829943 |
| 9  | 0.00516038  | 0.00048021  | 0.03694669 | 2.46775428  | 0.32828926 |
| 10 | 0.00064440  | 0.00064441  | 0.32829943 | 0.32828926  | 1.40433270 |
